# Supplementary material for: Kinetically stabilized 1,3-diarylisobenzofurans and the possibility of preparing large, persistent isoacenofurans with unusually small HOMO–LUMO gaps
Source: publisher site journal article supplement (doi:10.3762/bjoc.20.97), 2024-05-17
Supplement: Additional file 1 [file 1860-5397-20-97-S1.pdf]

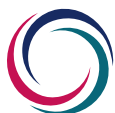

## Supporting Information

for

### **Kinetically stabilized 1,3-diarylisobenzofurans and the possibility of preparing large, persistent isoacenofurans with unusually small HOMO–LUMO gaps**

Qian Liu and Glen P. Miller

*Beilstein J. Org. Chem.* **2024**, *20*, 1099–1110. [doi:10.3762/bjoc.20.97](https://doi.org/10.3762/bjoc.20.97)

### **$^1\text{H}$ NMR stability studies for compounds 3 and 23, $^1\text{H}$ and $^{13}\text{C}$ NMR spectra for key compounds and ESI high-resolution mass spectra**

## Table of Contents

|                                                                               |     |
|-------------------------------------------------------------------------------|-----|
| <sup>1</sup> H NMR stability study for compounds <b>3</b> and <b>23</b> ..... | S3  |
| <sup>1</sup> H and <sup>13</sup> C NMR spectra of key compounds .....         | S8  |
| Electrospray ionization high-resolution mass spectra of new compounds .....   | S20 |

### Stability study for compounds **3** and **23** maintained in the solid state

When not in use, compounds **3** and **23** were stored in vials that were capped and wrapped in foil. The samples were otherwise not protected from ambient oxygen. Periodically, samples for  $^1\text{H}$  NMR spectroscopy were prepared.

$^1\text{H}$  NMR samples were prepared by separately dissolving compounds **3** and **23** in  $\text{CDCl}_3$ . The resulting solutions were placed in standard 5 mm NMR tubes and capped with standard plastic NMR tube caps.

Select spectra are displayed on the following 2 pages.

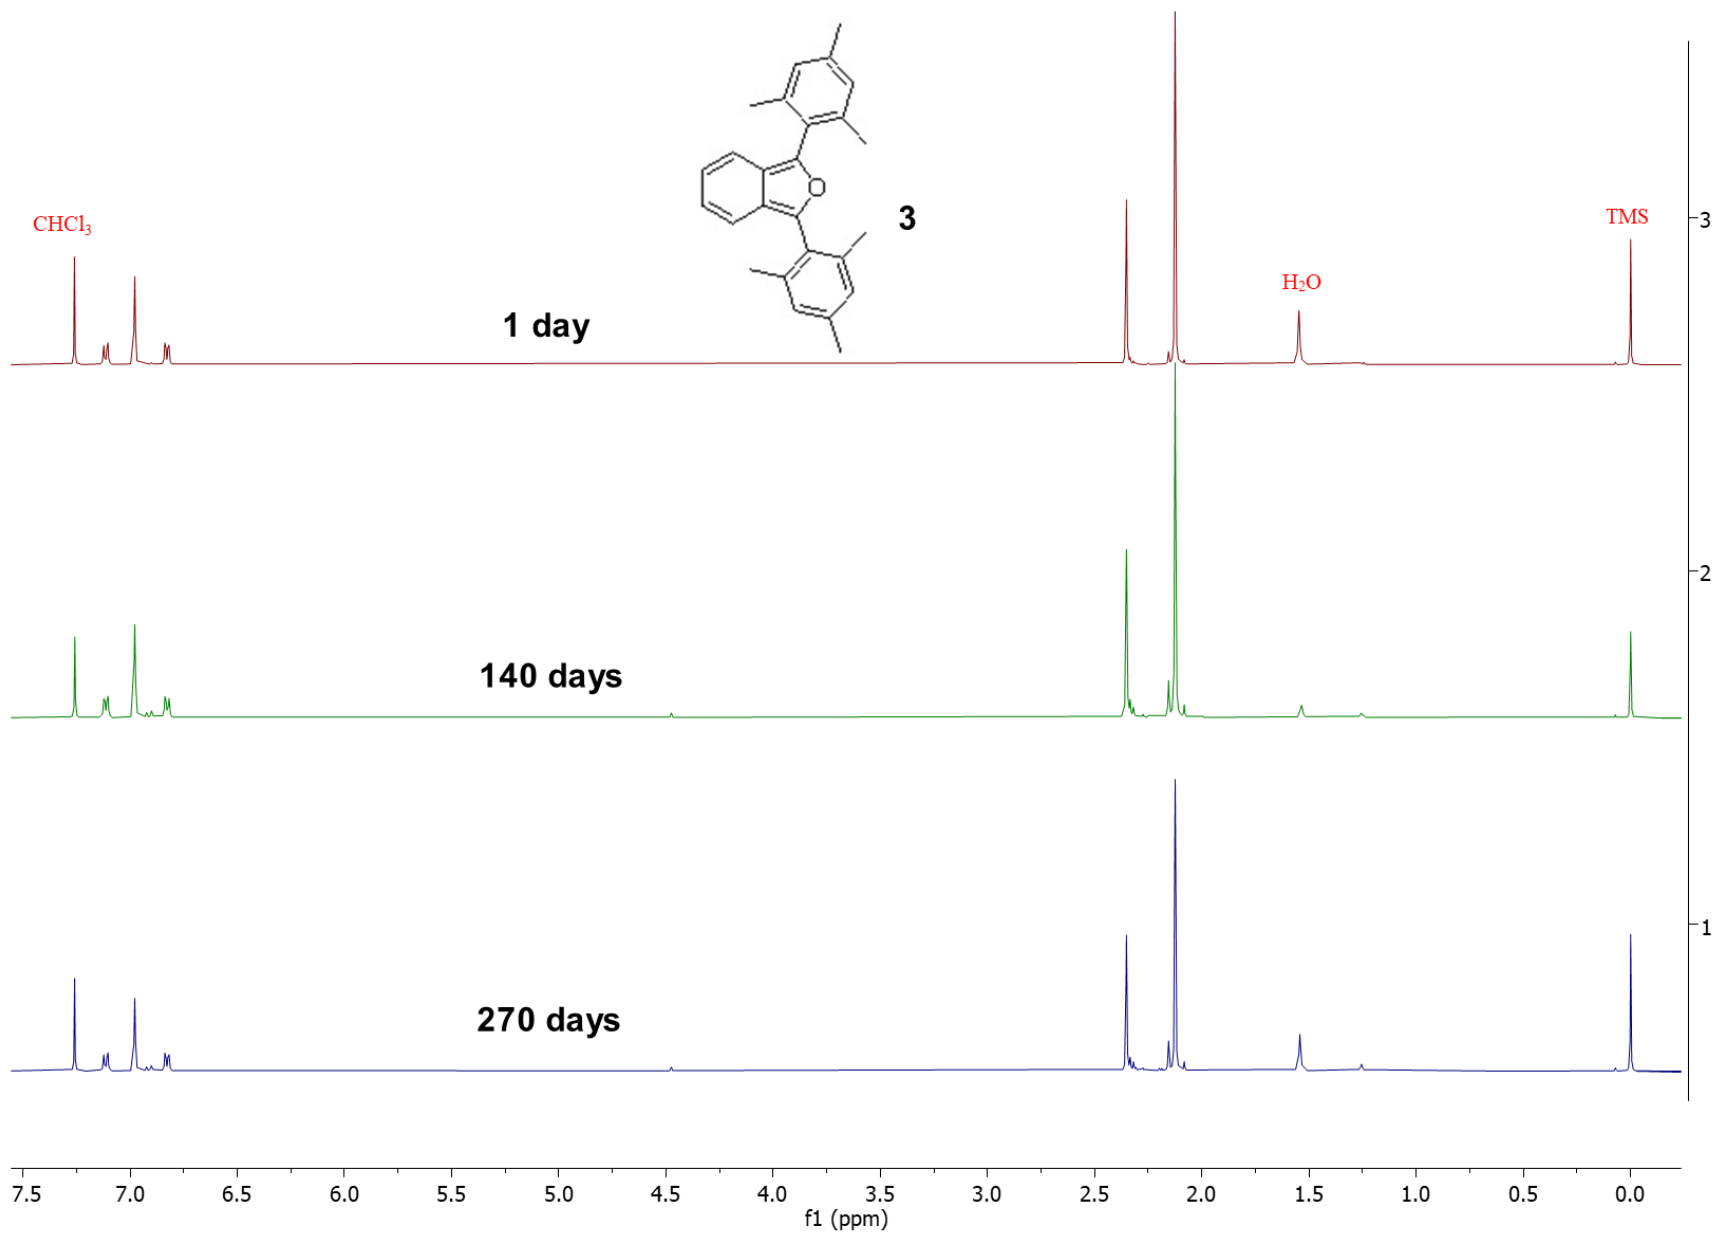

S3

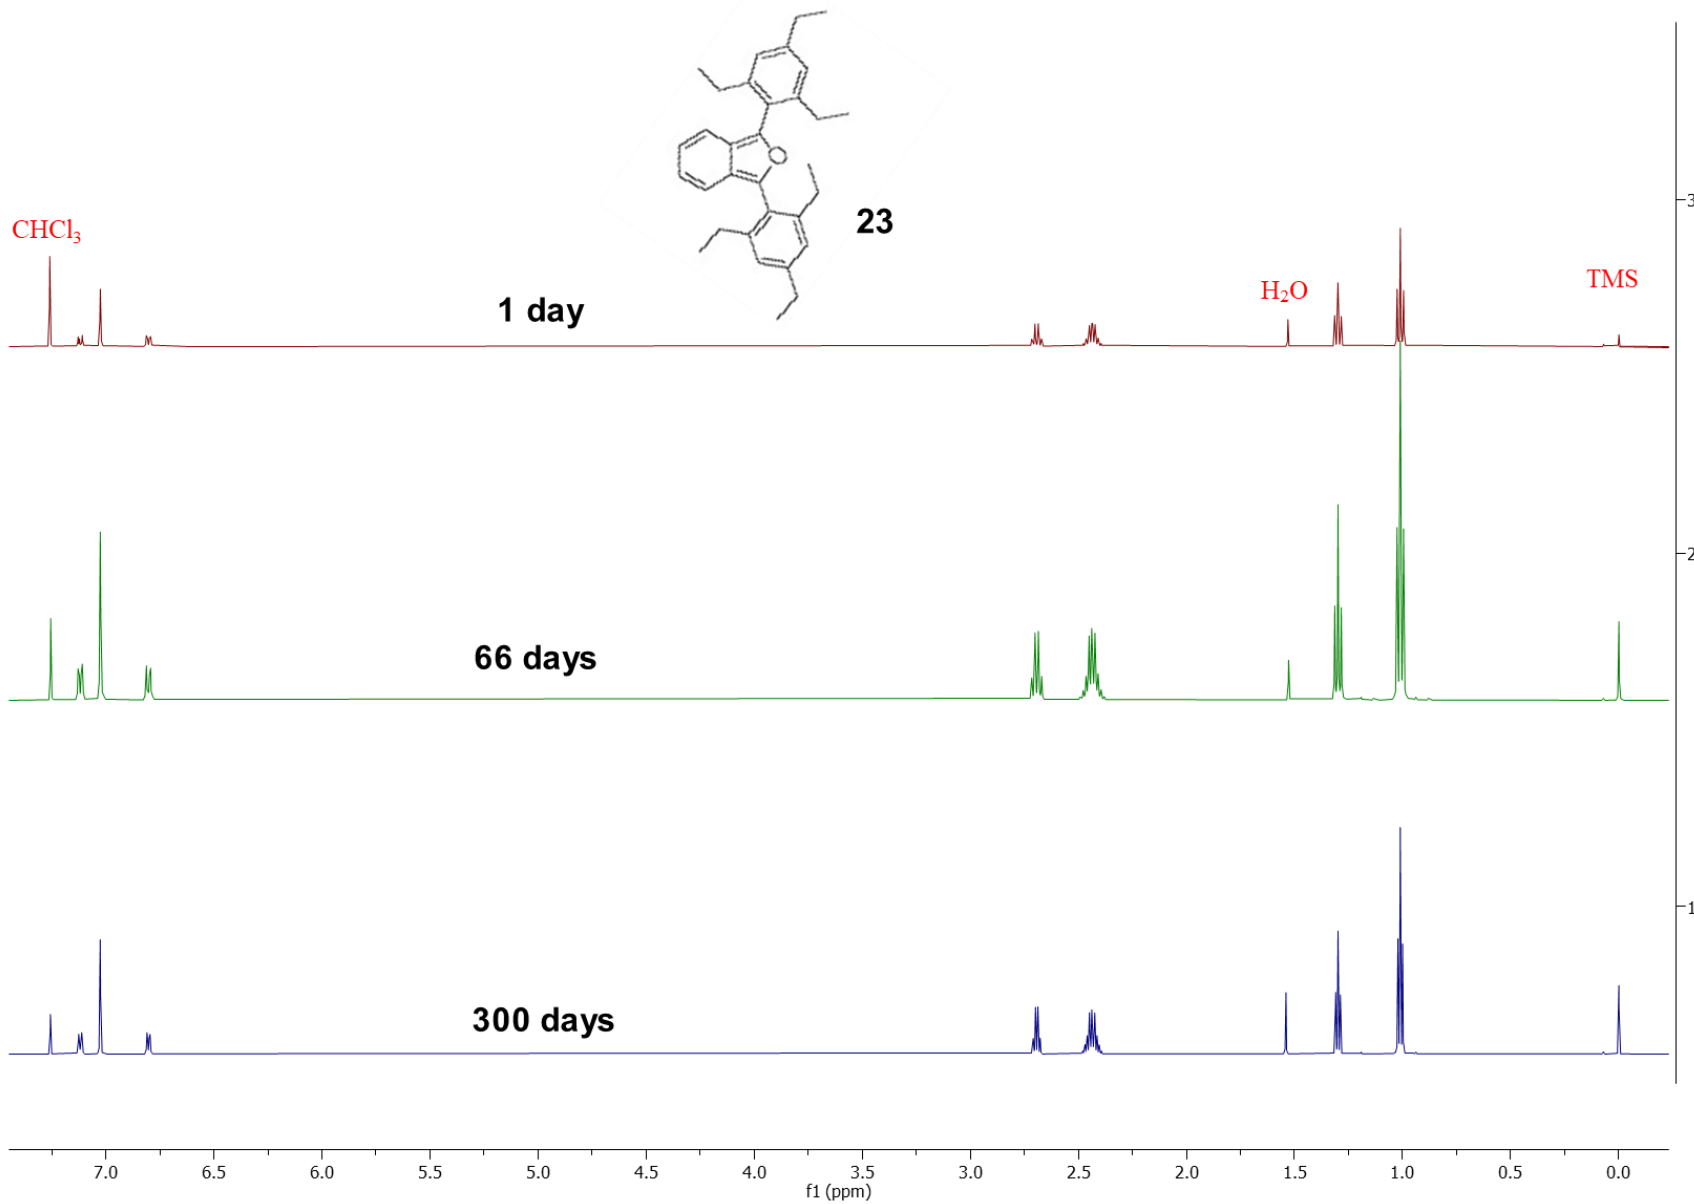

**S4**

### Stability study for compound **3** maintained in solution

A solution composed of 15 mg of compound **3** was dissolved in 0.6 ml of CDCl<sub>3</sub> and placed in a 5 mm NMR tube with plastic cap. The tube was capped but otherwise not protected from air or ambient light. <sup>1</sup>H NMR spectra were acquired periodically over 50 days.

Solution Phase Stability of **3**

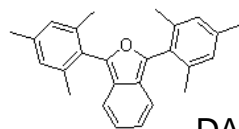

**1,3-dimesitylisobenzofuran (3)**

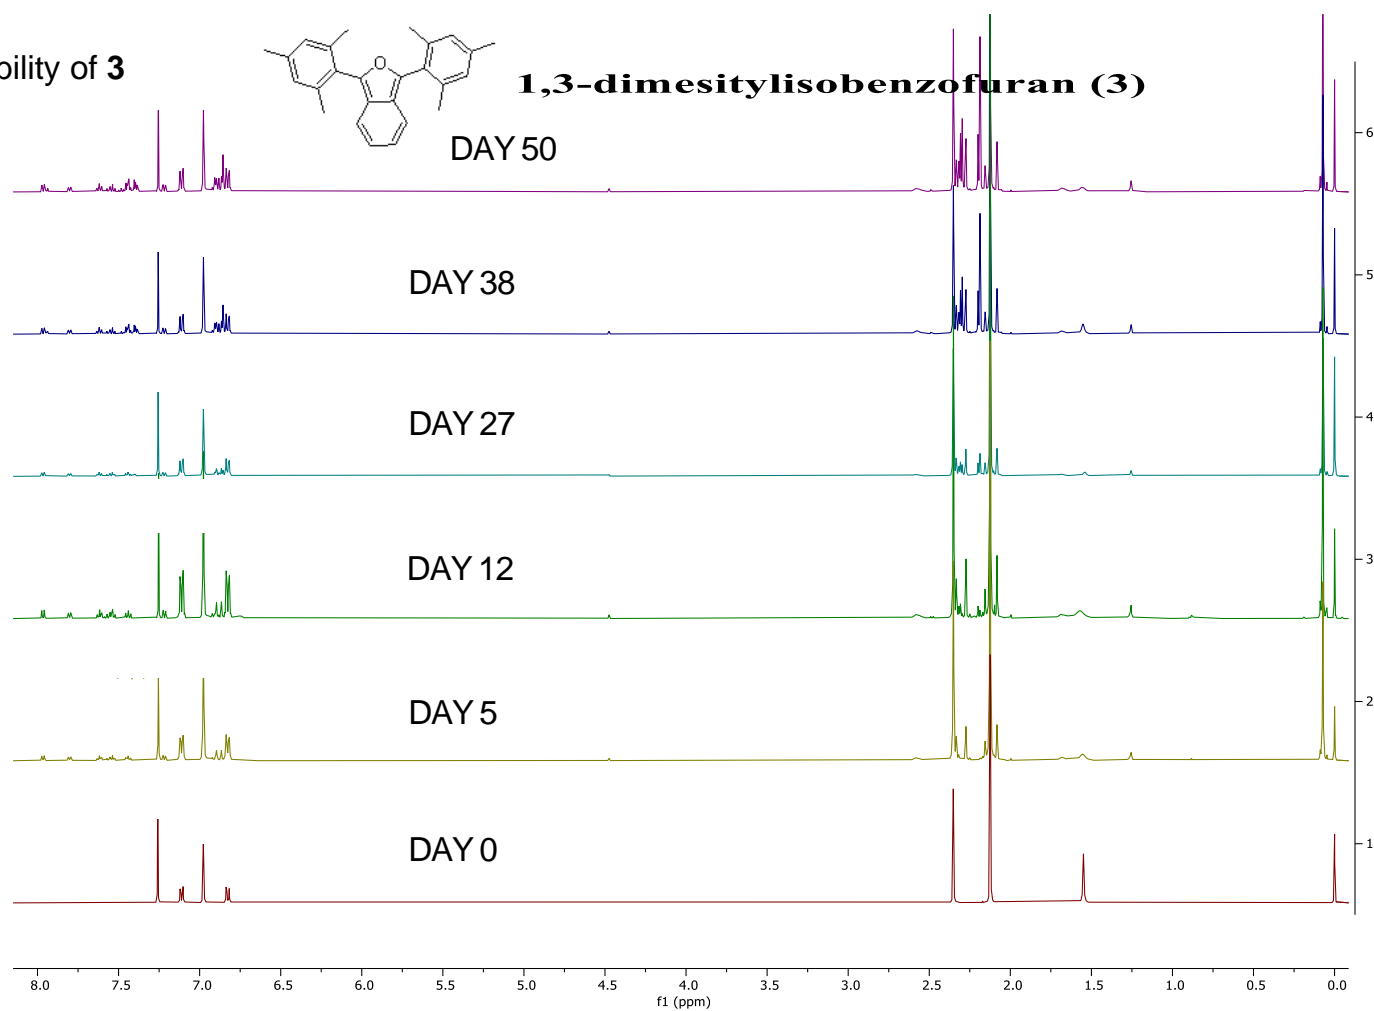

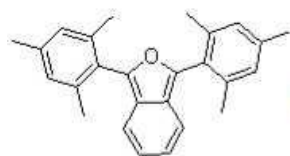

### 1,3-dimesitylisobenzofuran (3)

<sup>1</sup>H NMR (500 MHz, CDCl<sub>3</sub>)

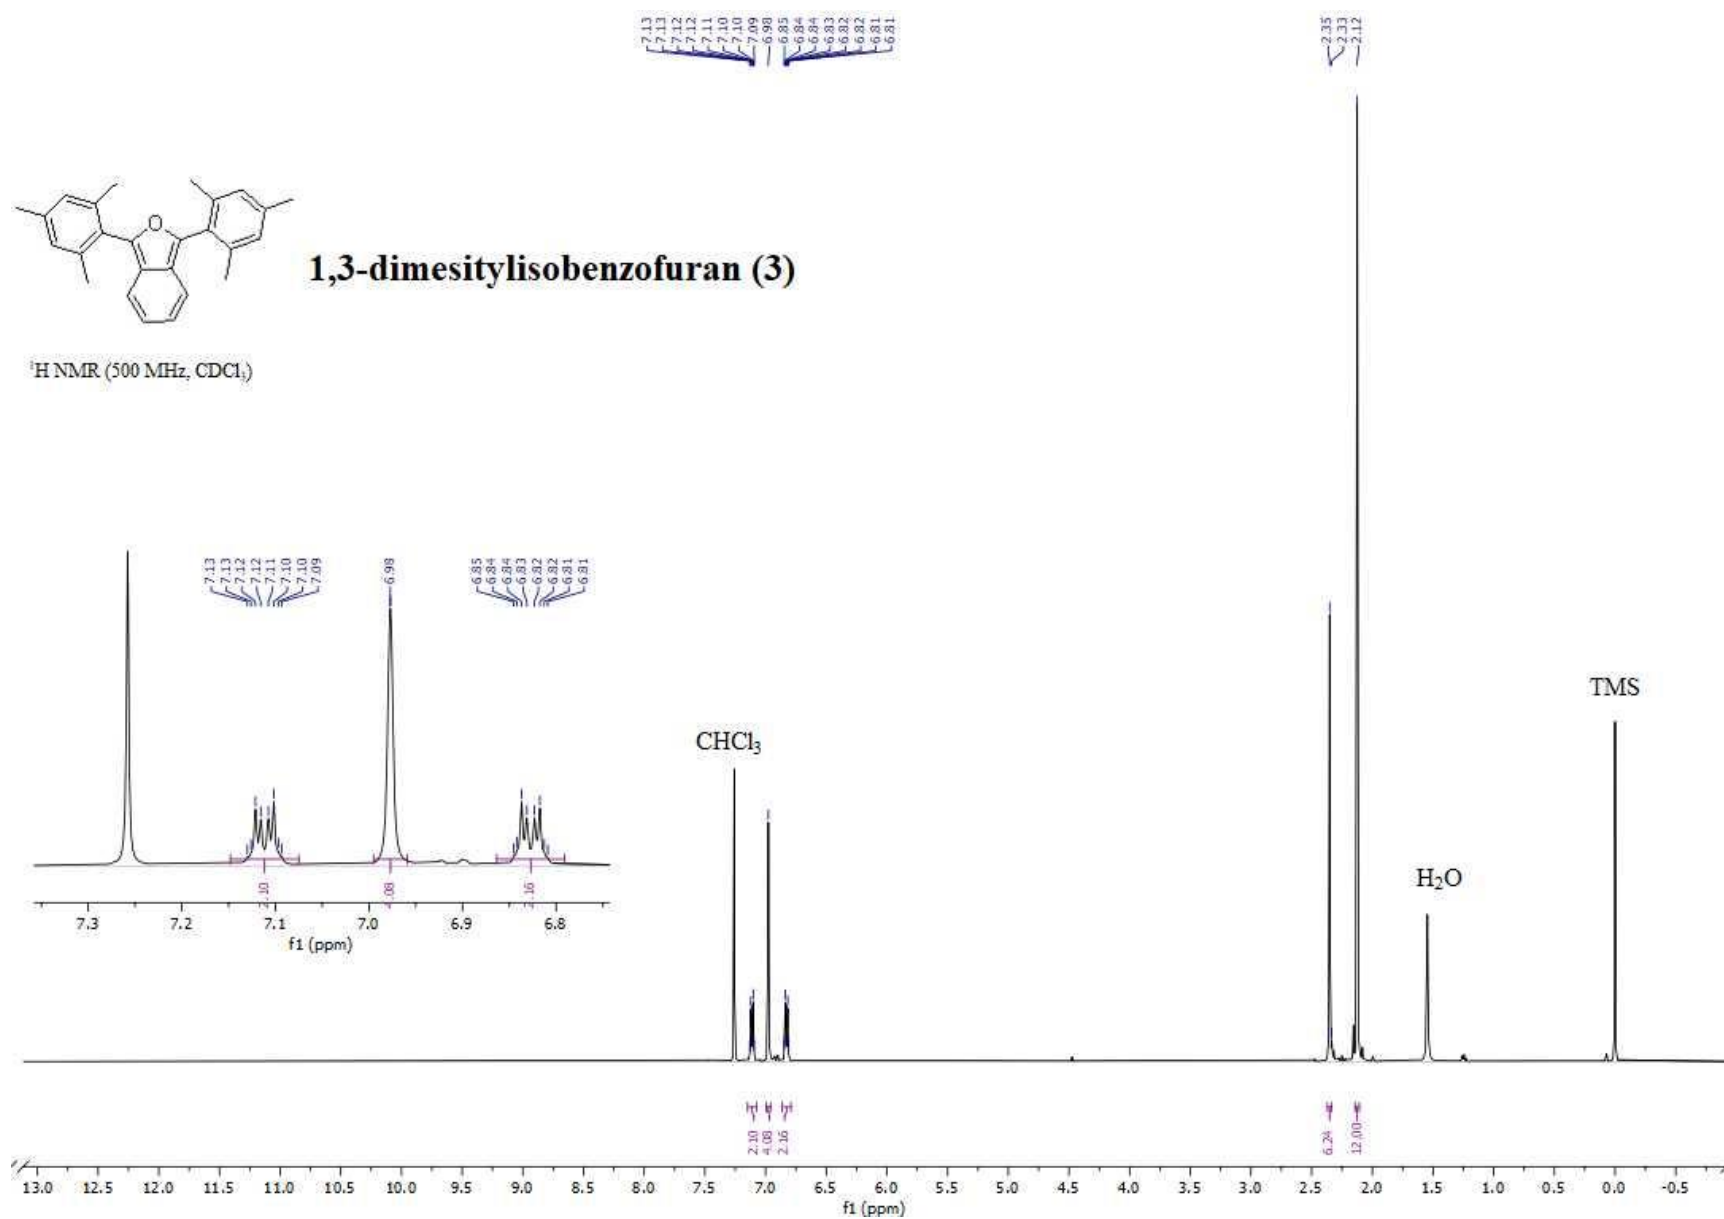



### 1,3-dimesitylisobenzofuran (3)

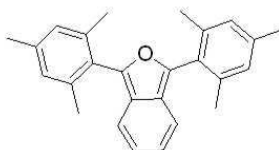

$^{13}\text{C}$  NMR (126 MHz,  $\text{CDCl}_3$ )  $\delta$  143.54, 139.17, 138.71, 128.23, 127.43, 123.39, 121.93, 119.78, 21.22, 20.49.

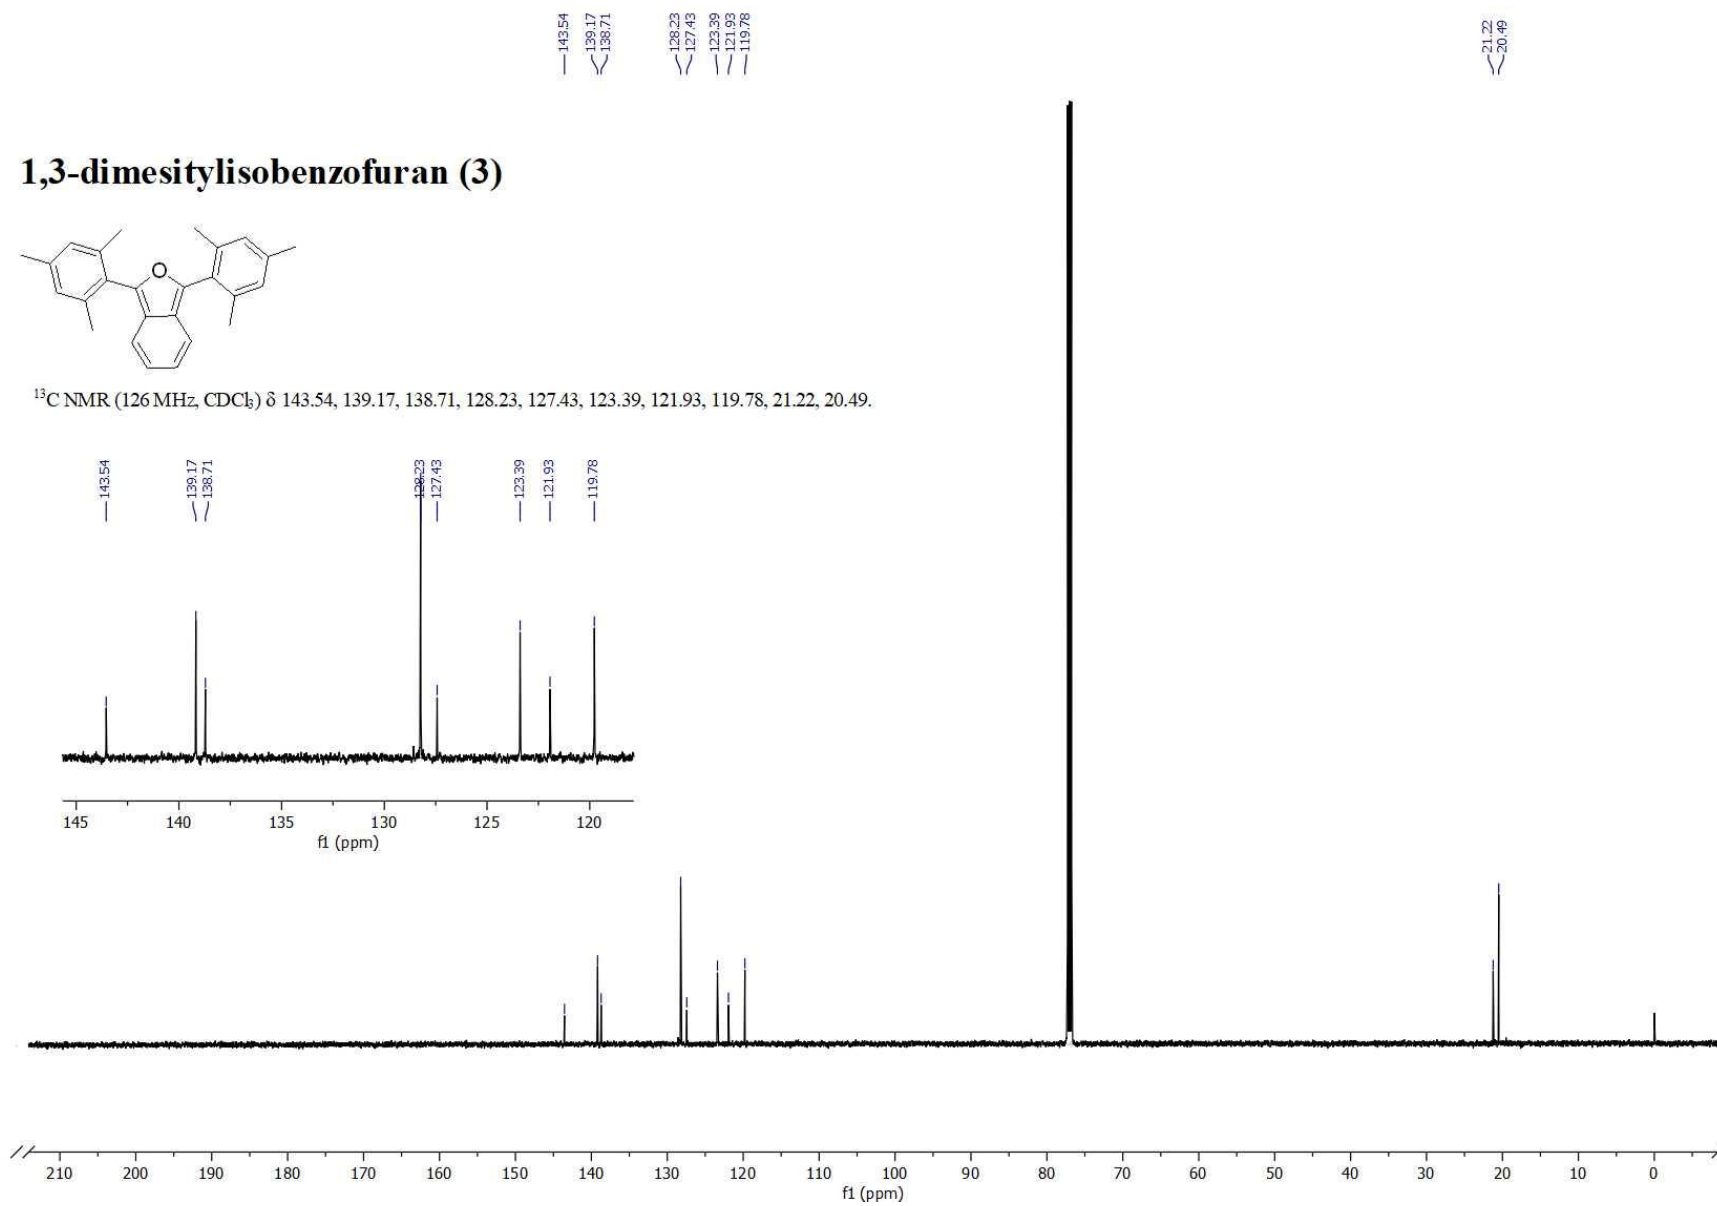

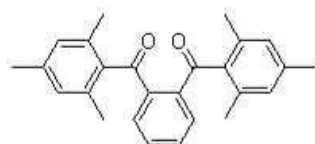

**Diketone (21)**

<sup>1</sup>H NMR (500 MHz, CDCl<sub>3</sub>)

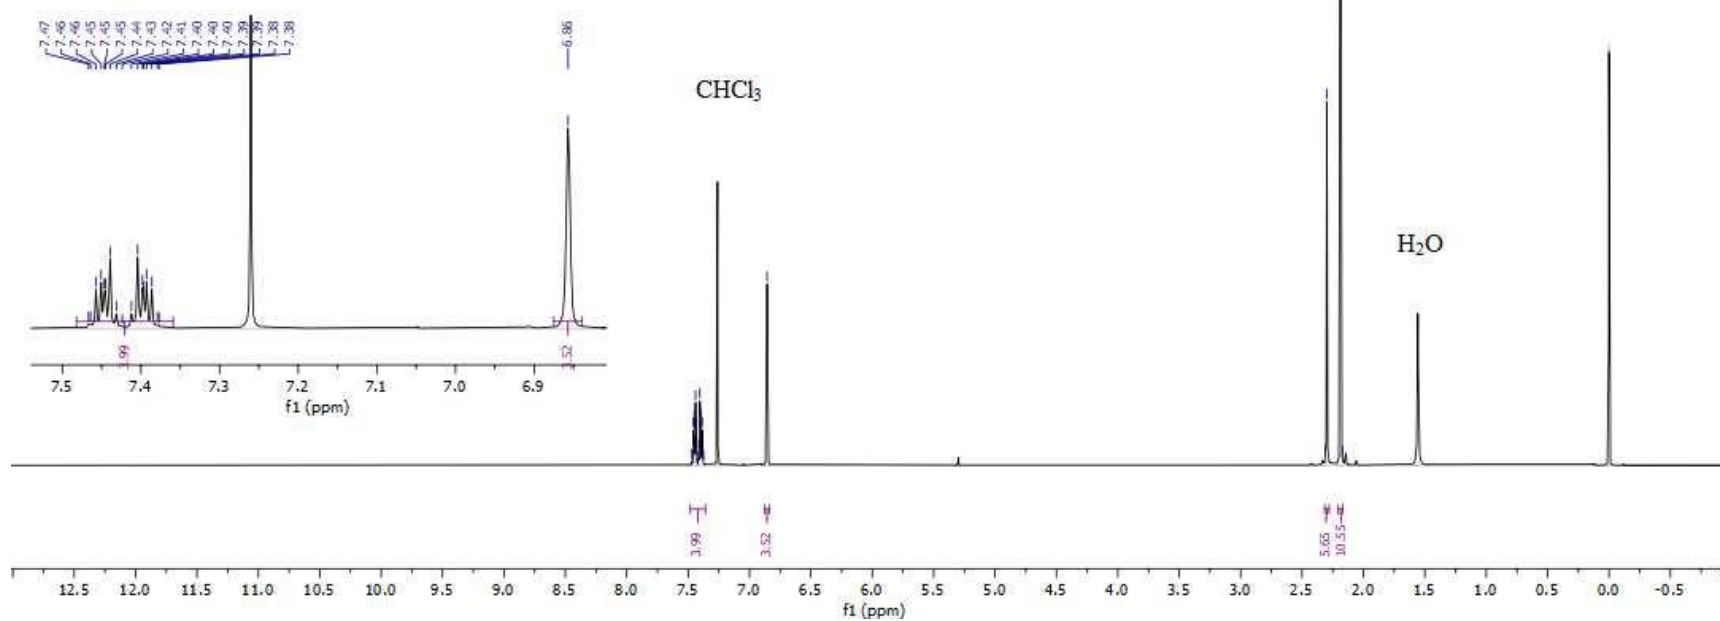

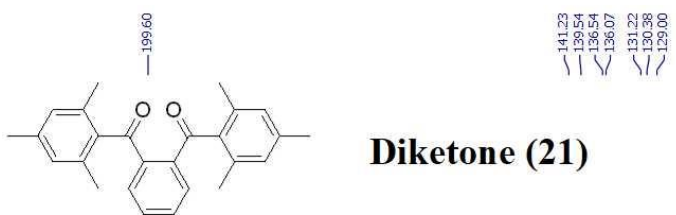

$^{13}\text{C}$  NMR (126 MHz,  $\text{CDCl}_3$ )  $\delta$  199.60, 141.23, 139.54, 136.54, 136.07, 131.22, 130.38, 129.00, 21.17, 20.29.

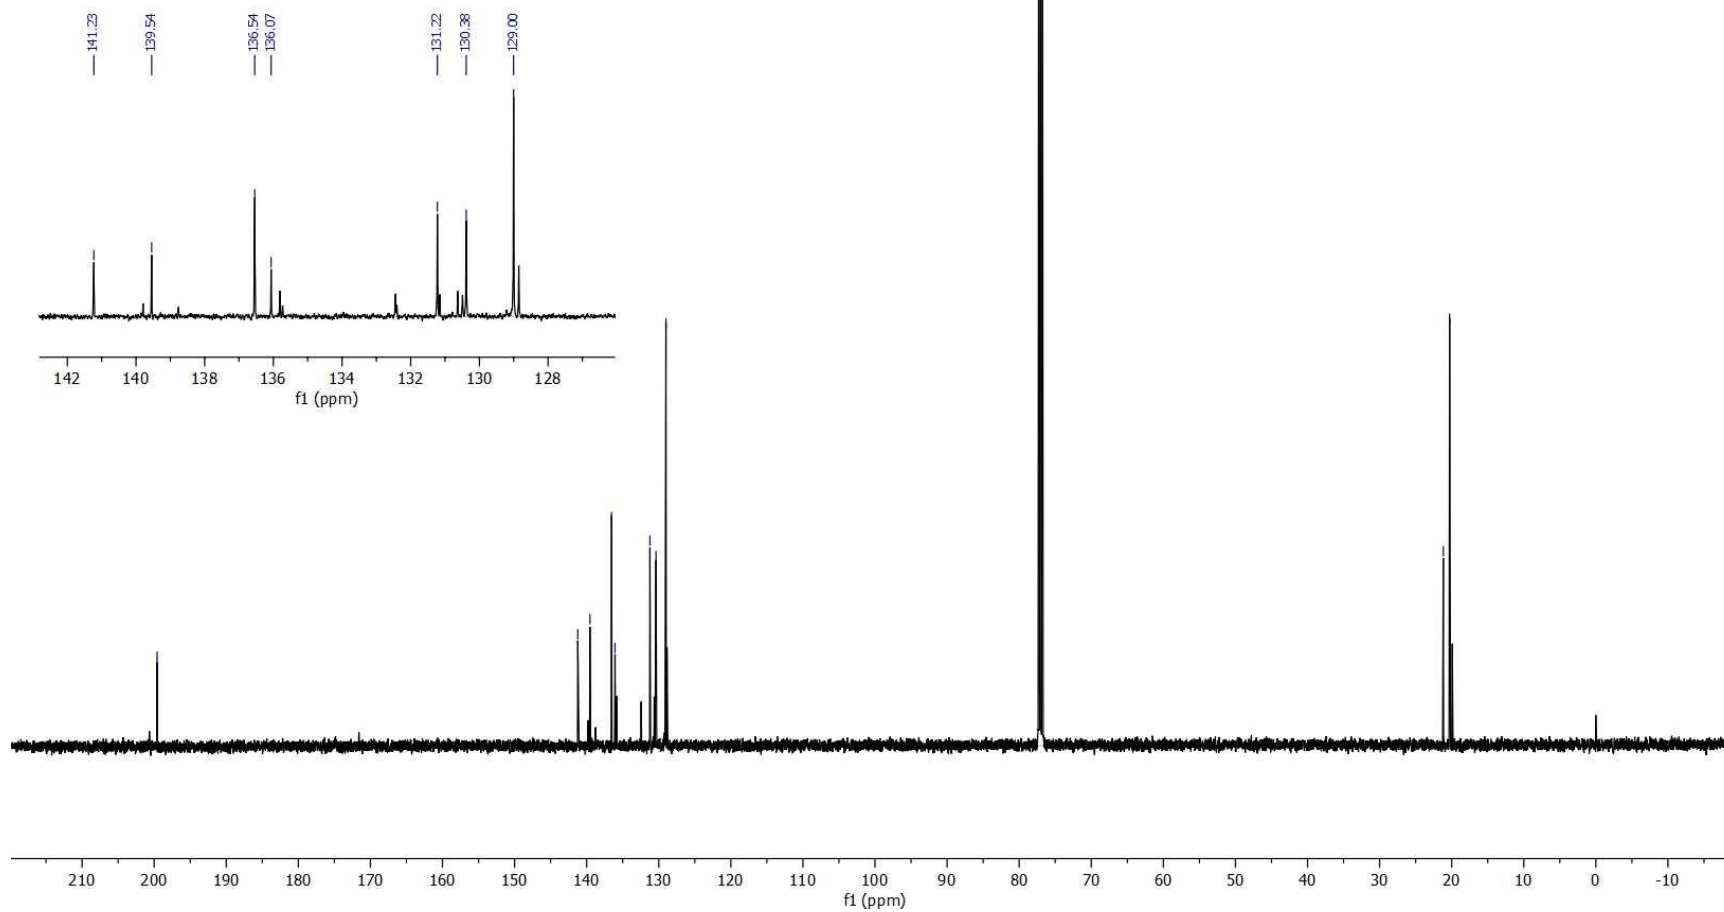

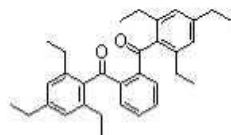

<sup>1</sup>H NMR (500 MHz, CDCl<sub>3</sub>)

### Diketone (22)

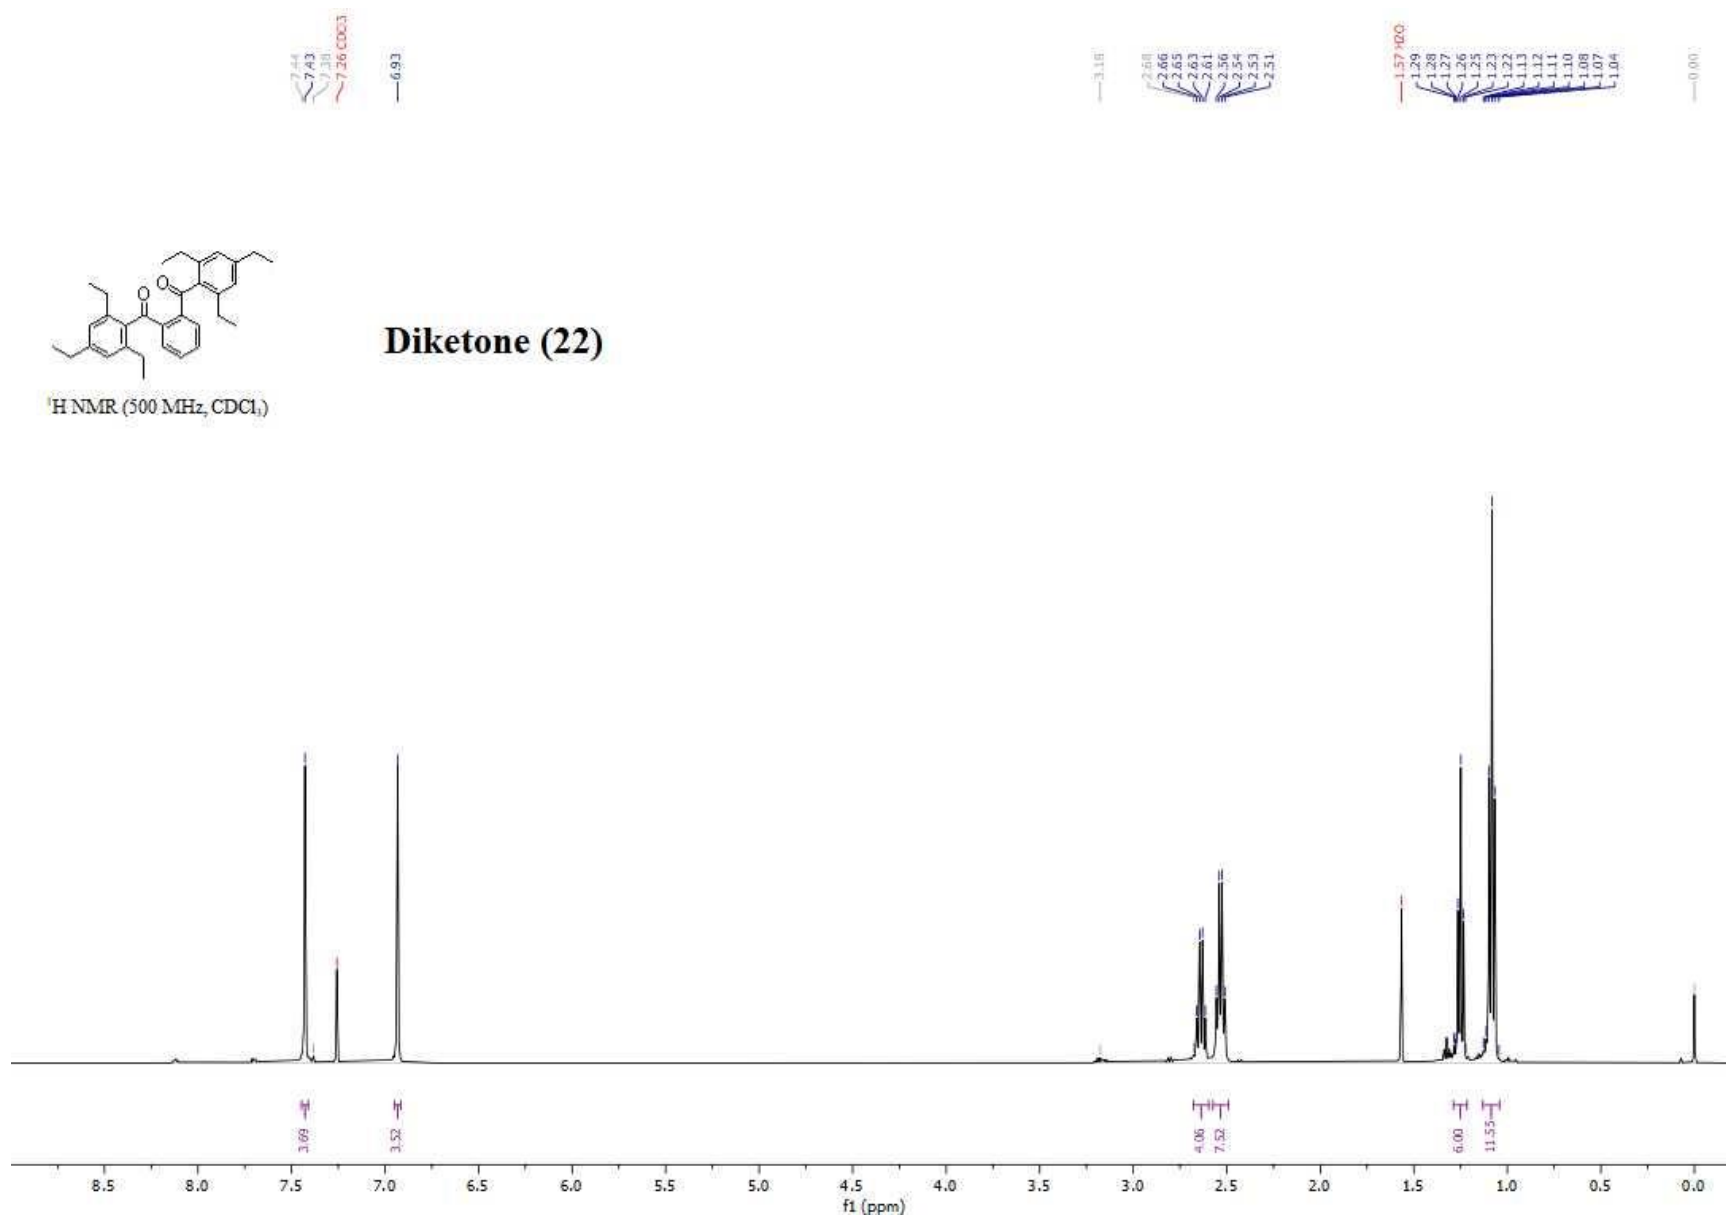

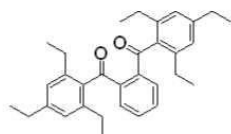

**Diketone (22)**

$^{13}\text{C}$  NMR (126 MHz,  $\text{CDCl}_3$ )  $\delta$  199.43, 145.73, 142.40, 141.03, 135.73, 131.19, 131.05, 125.93, 28.78, 26.50, 15.81, 15.34.

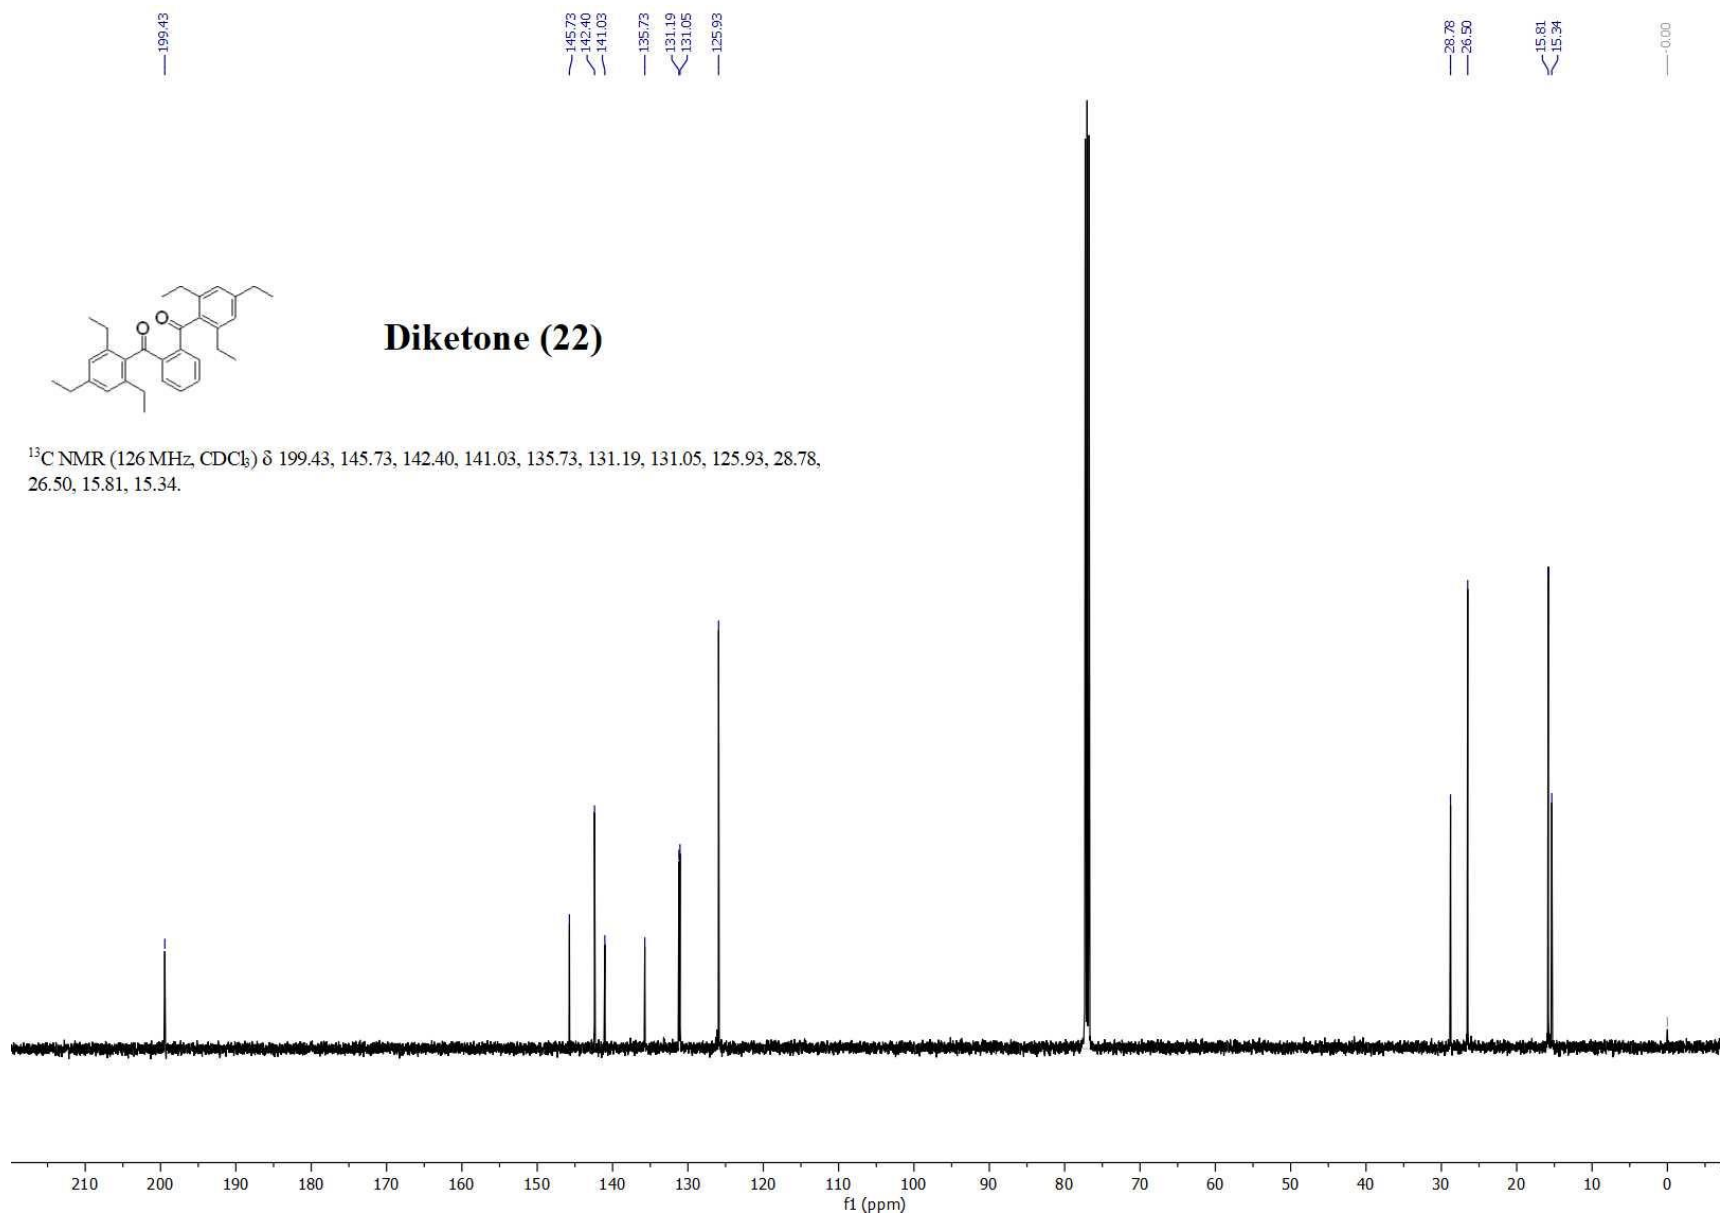

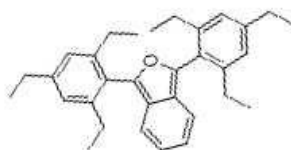

**1,3-bis(2,4,6-triethylphenyl)isobenzofuran (23)**

<sup>1</sup>H NMR (500 MHz, CDCl<sub>3</sub>)

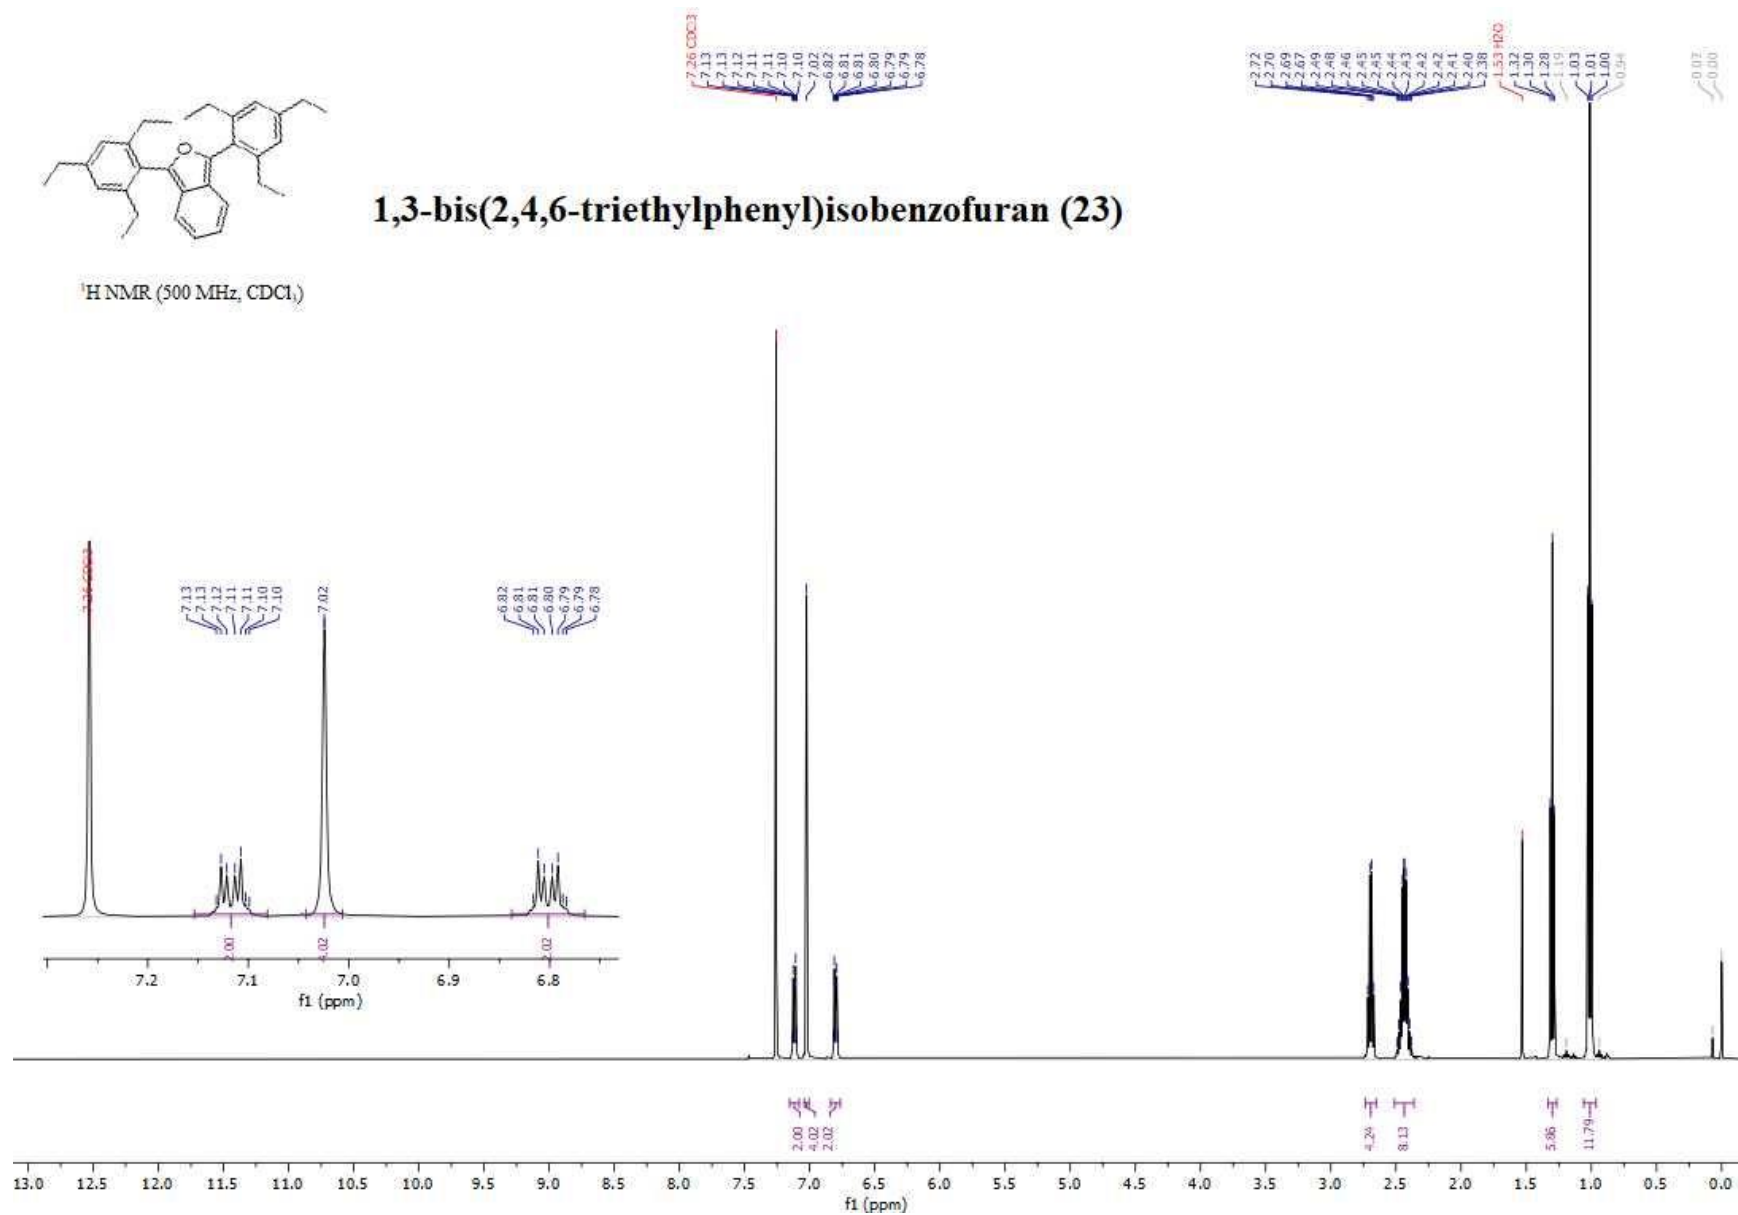

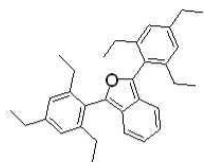

### 1,3-bis(2,4,6-triethylphenyl)isobenzofuran (23)

$^{13}\text{C}$  NMR (126 MHz,  $\text{CDCl}_3$ )  $\delta$  145.90, 145.48, 143.28, 126.29, 125.50, 123.32, 122.18, 119.64, 28.85, 27.14, 15.82, 15.37.

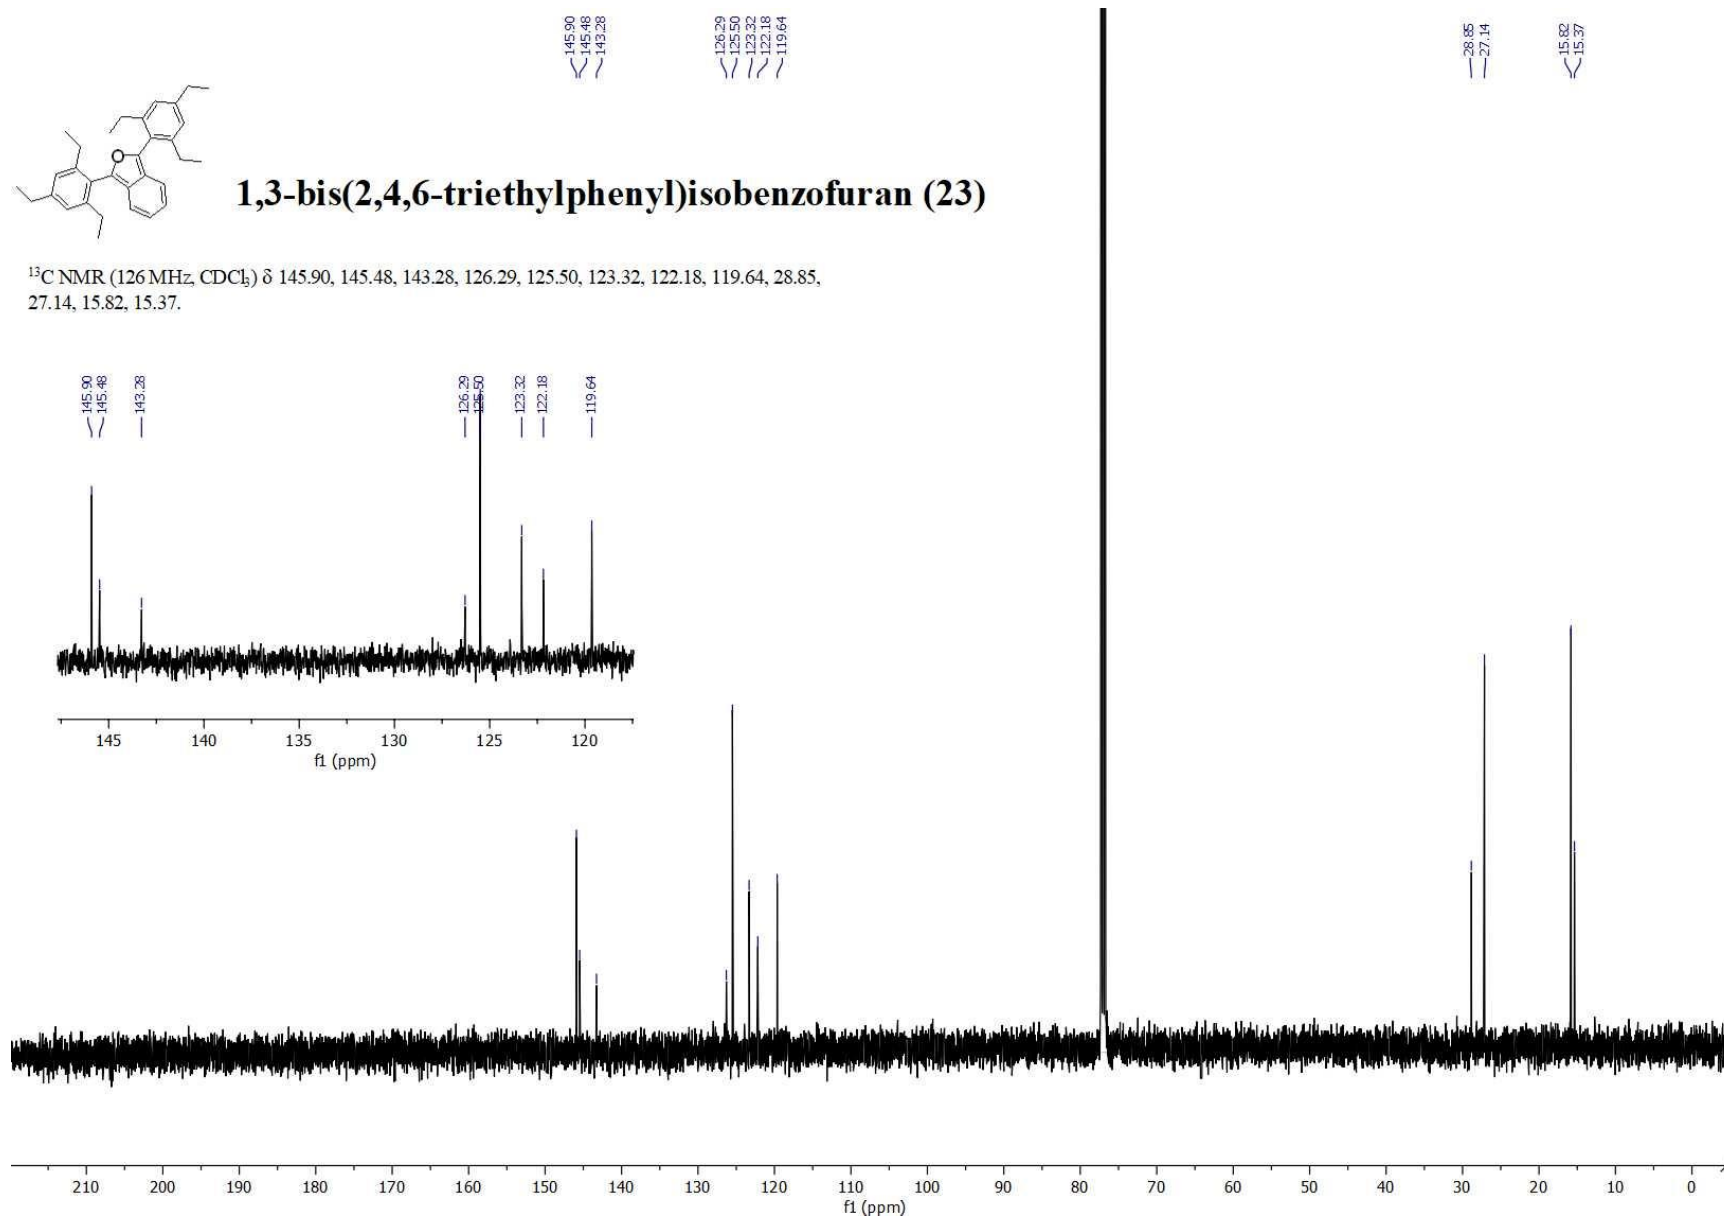

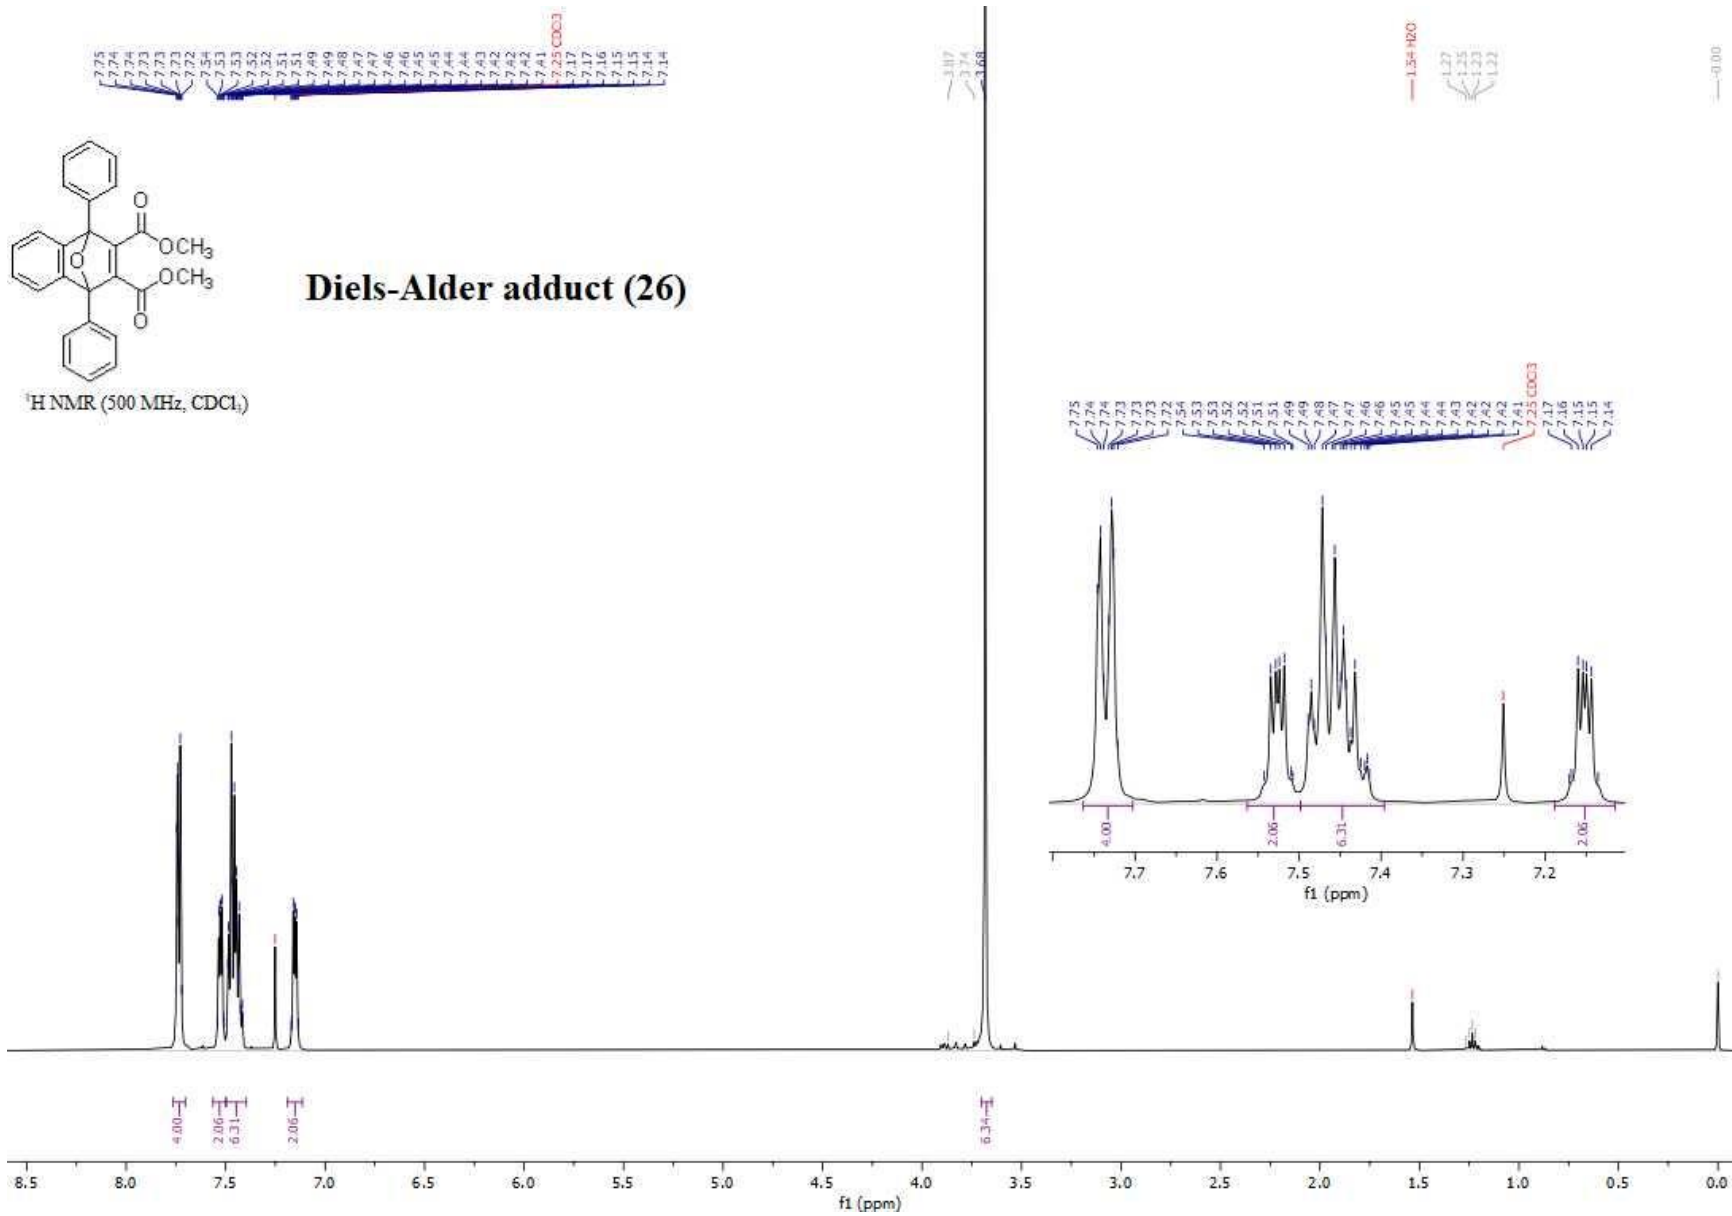



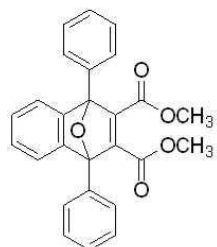

**Diels-Alder adduct (26)**

$^{13}\text{C}$  NMR (126 MHz,  $\text{CDCl}_3$ )  $\delta$  164.14, 153.90, 149.13, 133.16, 129.08, 128.58, 128.00, 125.99, 122.20, 94.05, 52.29.

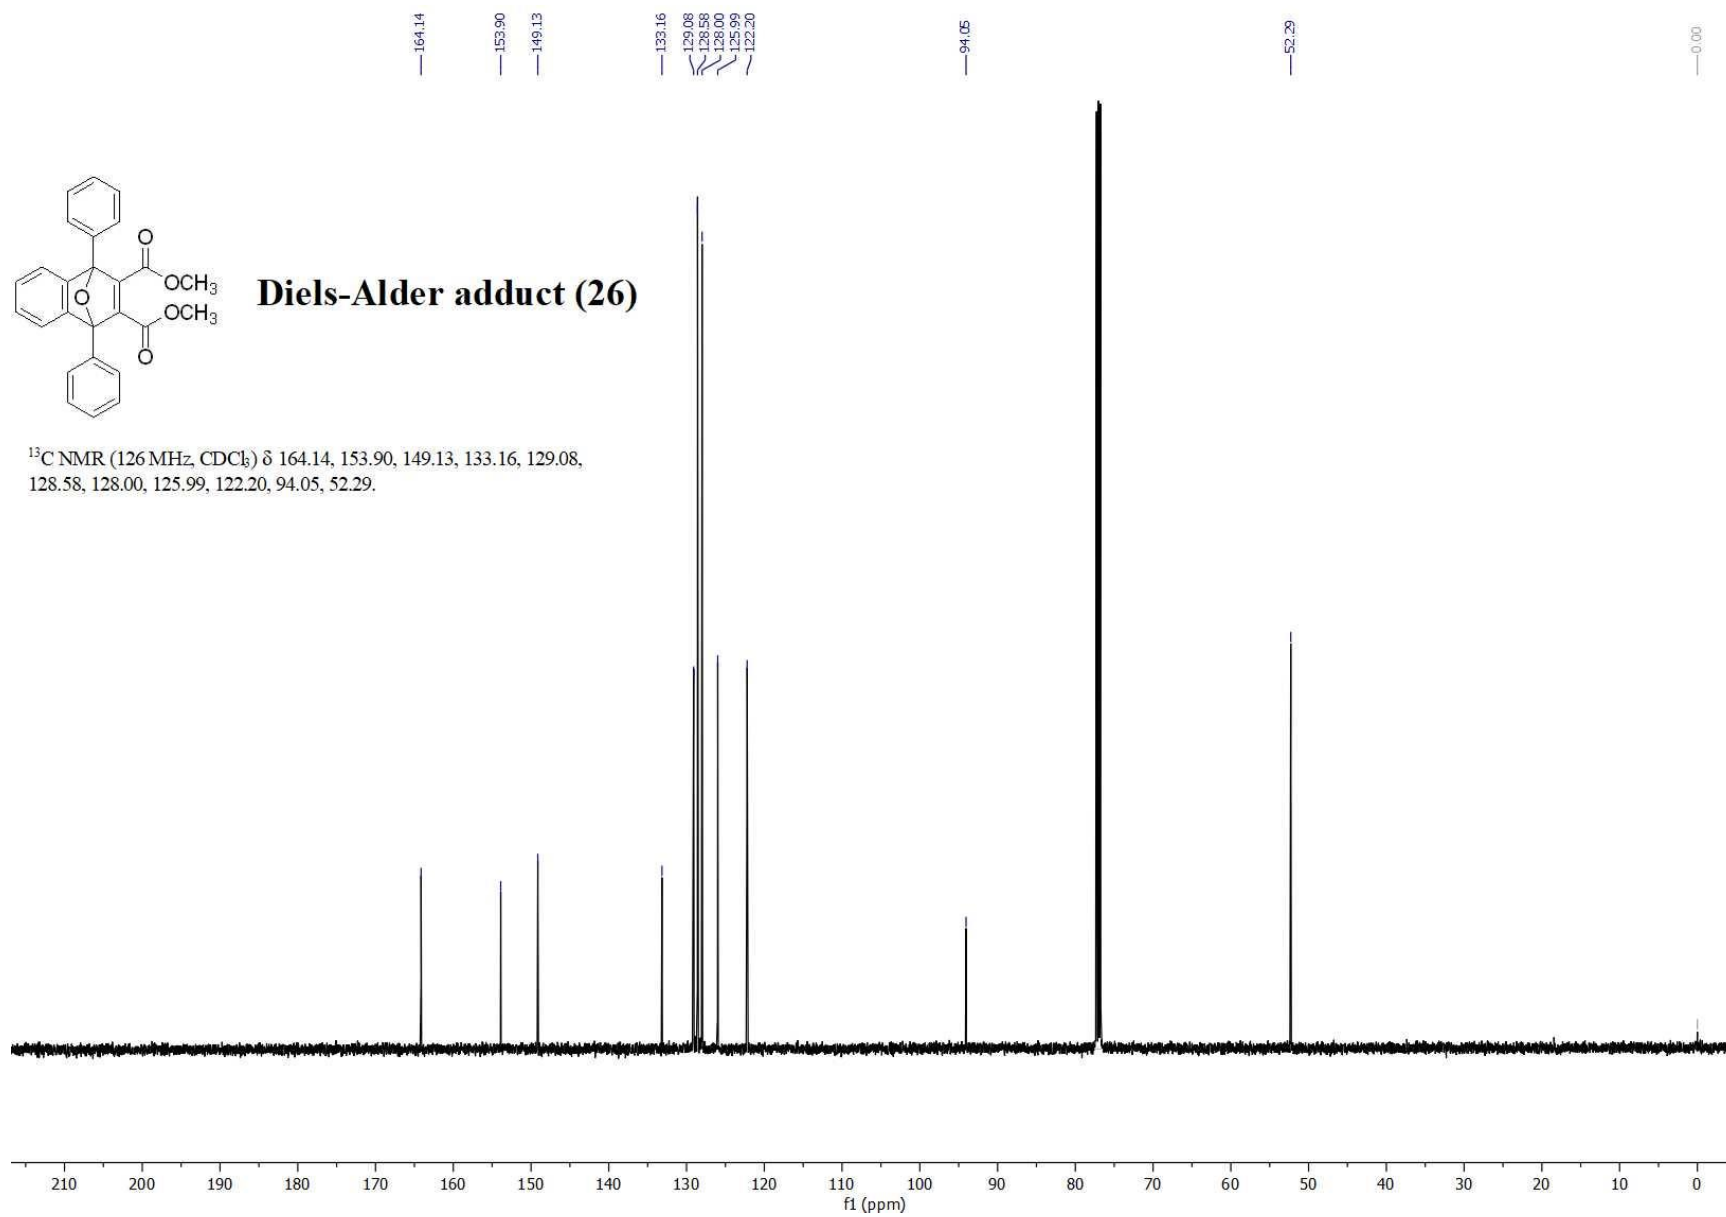



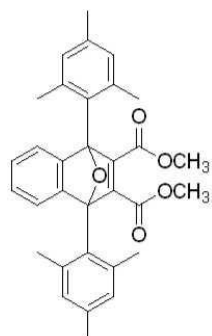

### Diels-Alder adduct (27)

$^{13}\text{C}$  NMR (176 MHz,  $\text{CDCl}_3$ )  $\delta$  164.38, 155.13, 151.10, 139.03, 137.93, 130.68, 128.02, 124.72, 124.49, 95.54, 51.98, 23.71, 20.75.

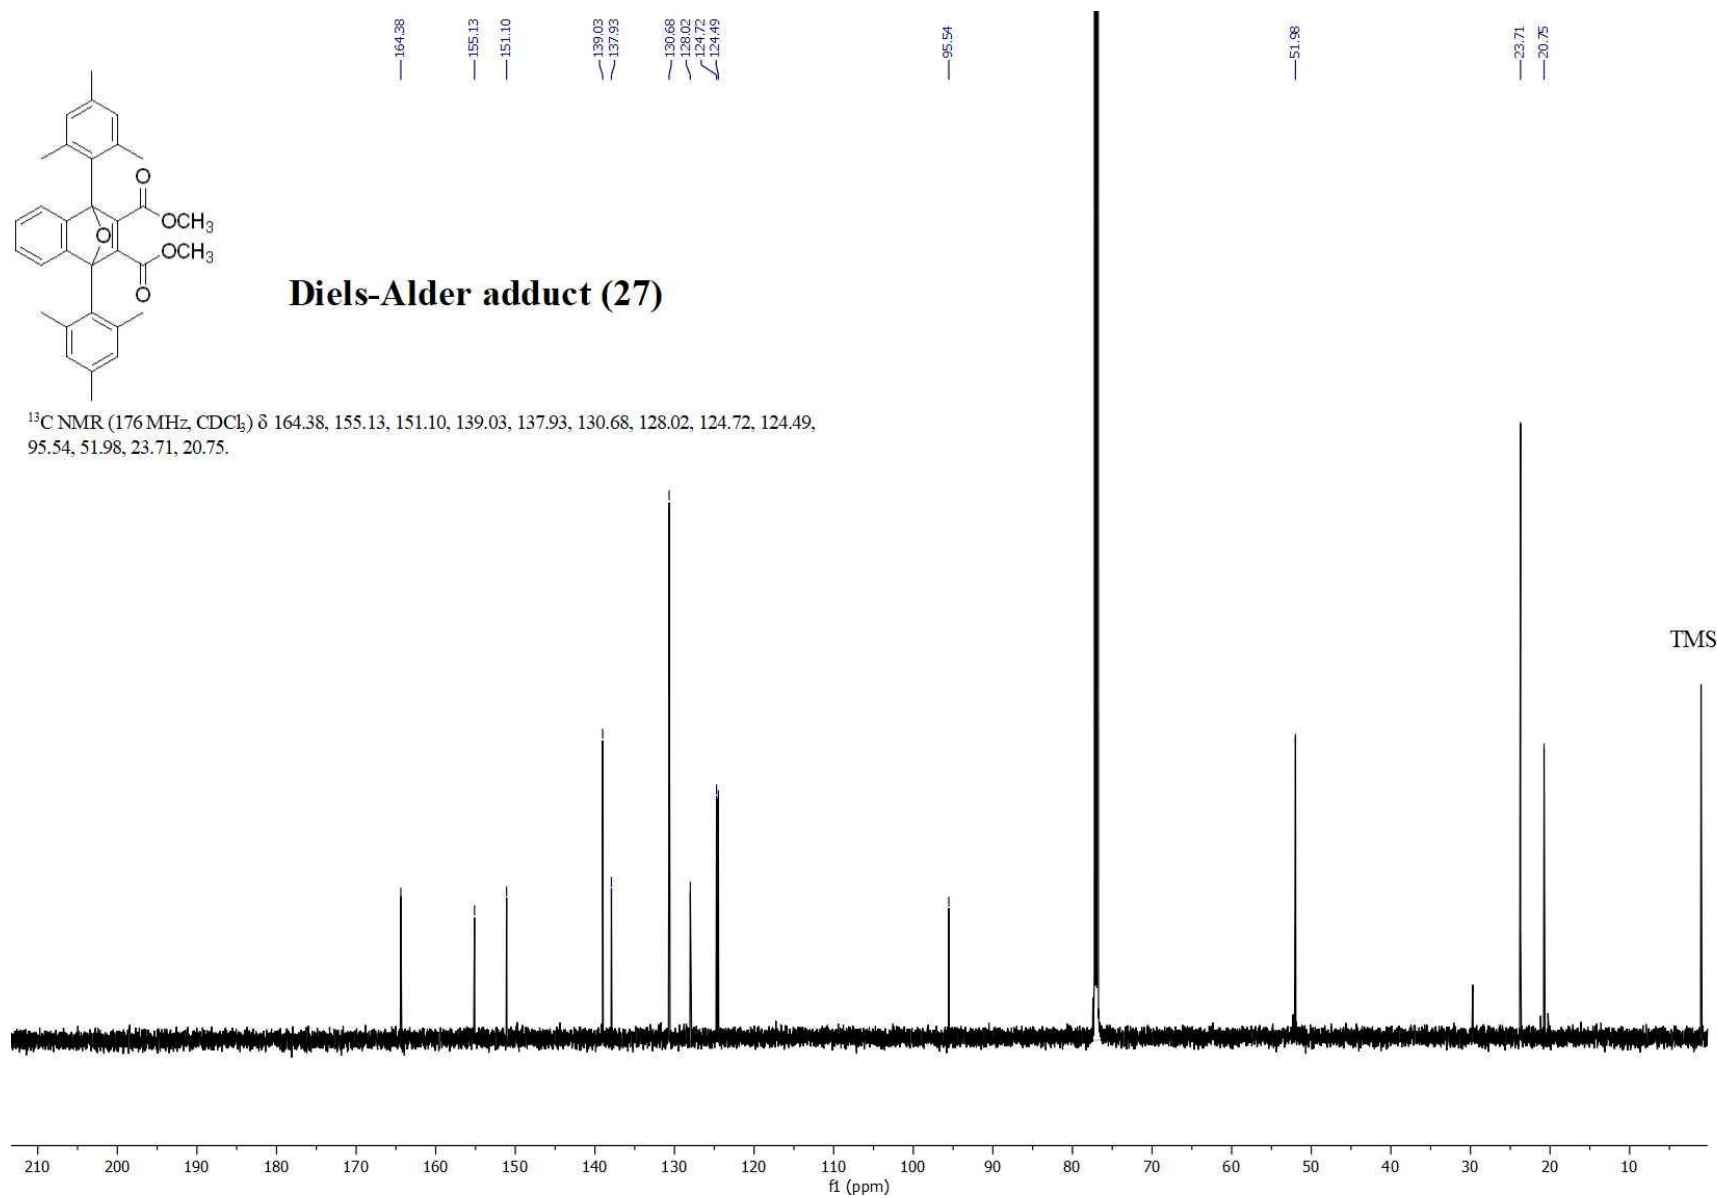

T: FTMS + p ESI Full ms [100.0000-1000.0000]

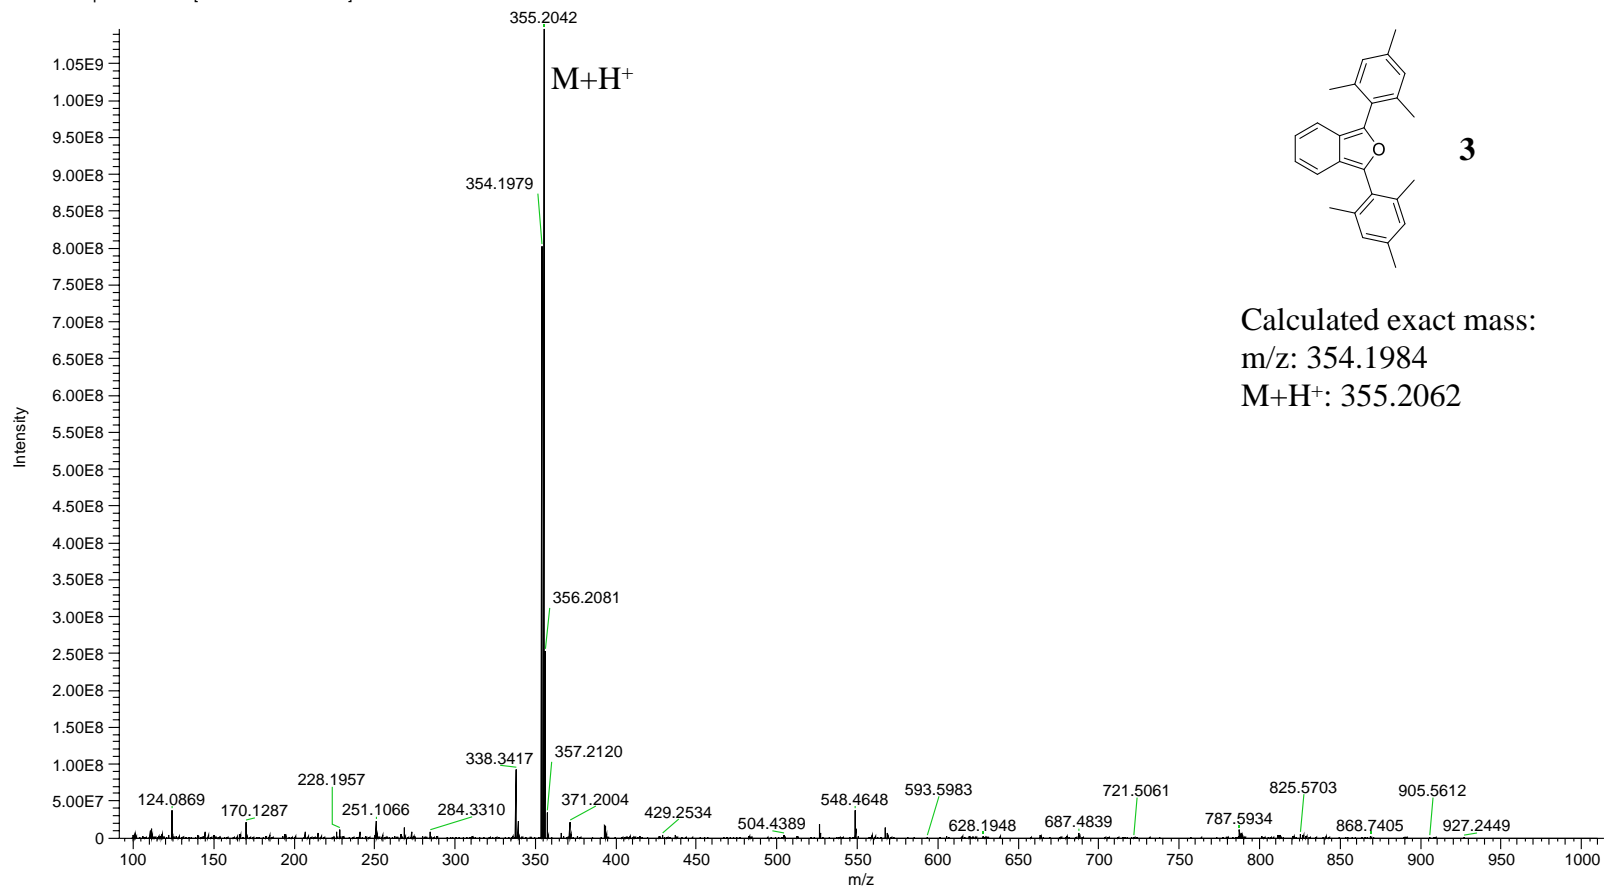

Calculated exact mass:  
m/z: 354.1984  
M+H+: 355.2062

T: FTMS + p ESI Full ms [100.0000-1000.0000]

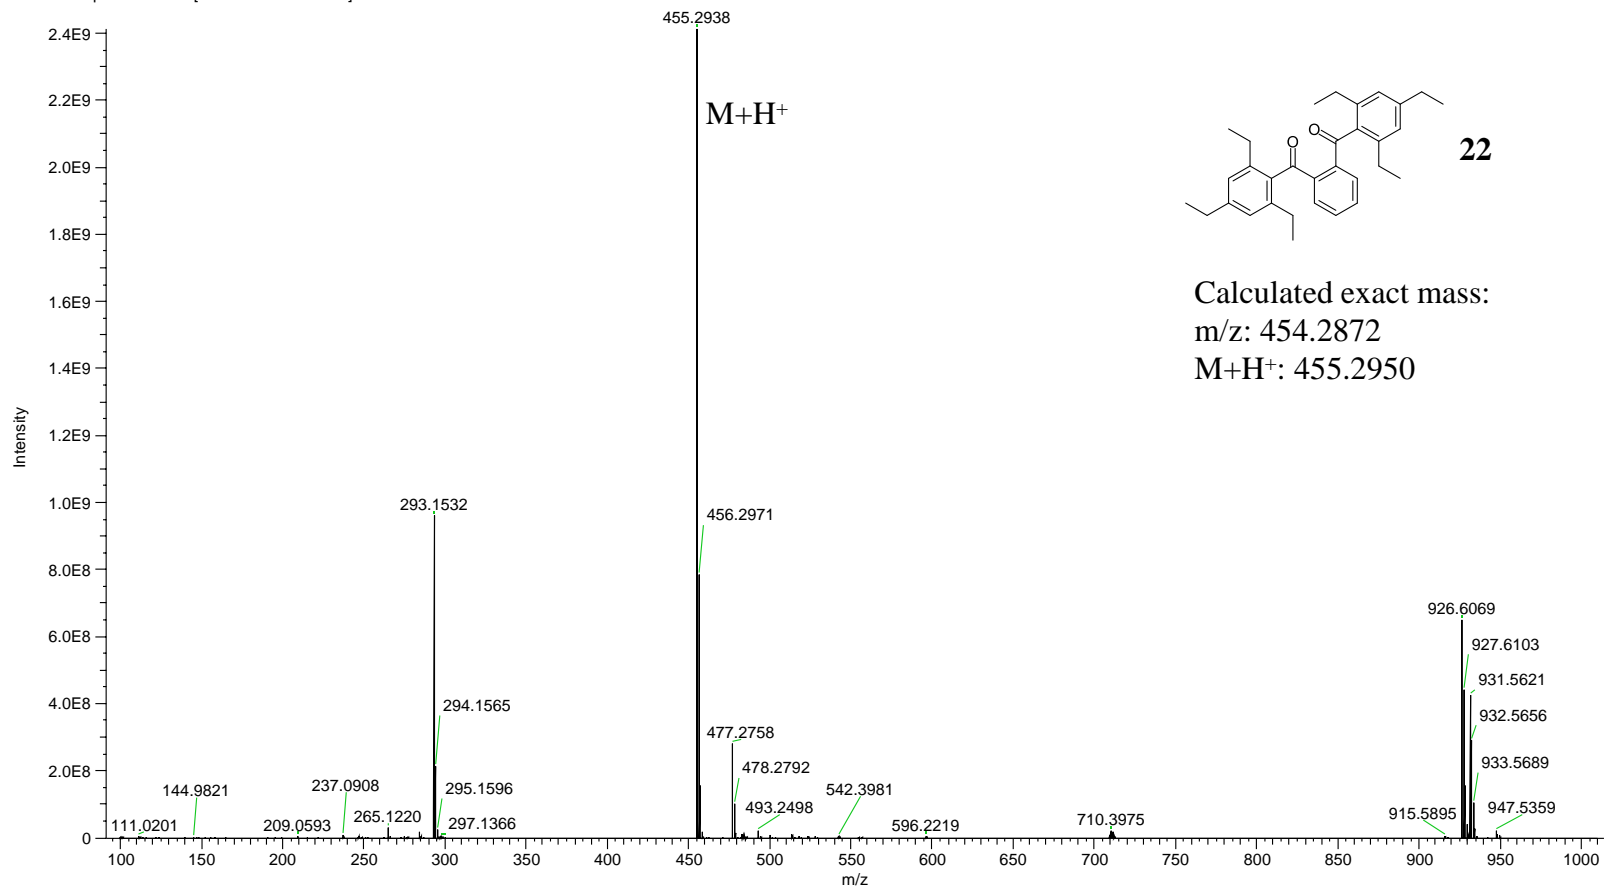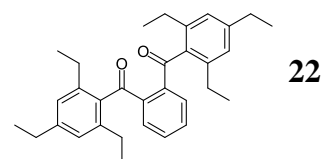

Calculated exact mass:  
m/z: 454.2872  
M+H<sup>+</sup>: 455.2950

T: FTMS + p ESI Full ms [100.0000-1000.0000]

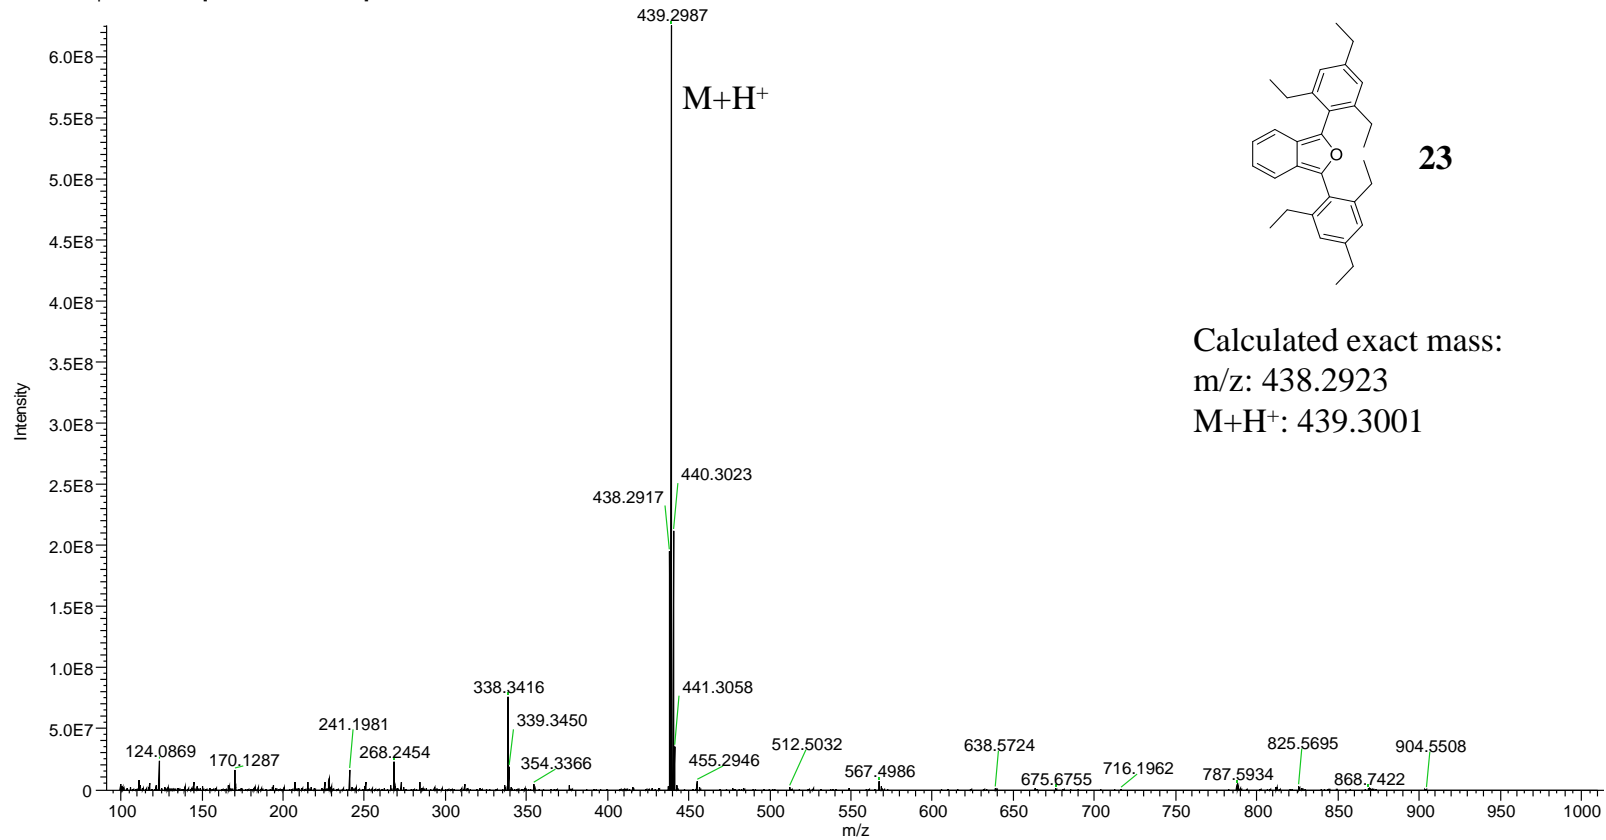

Calculated exact mass:  
m/z: 438.2923  
M+H<sup>+</sup>: 439.3001

T: FTMS + p ESI Full ms [100.0000-1000.0000]

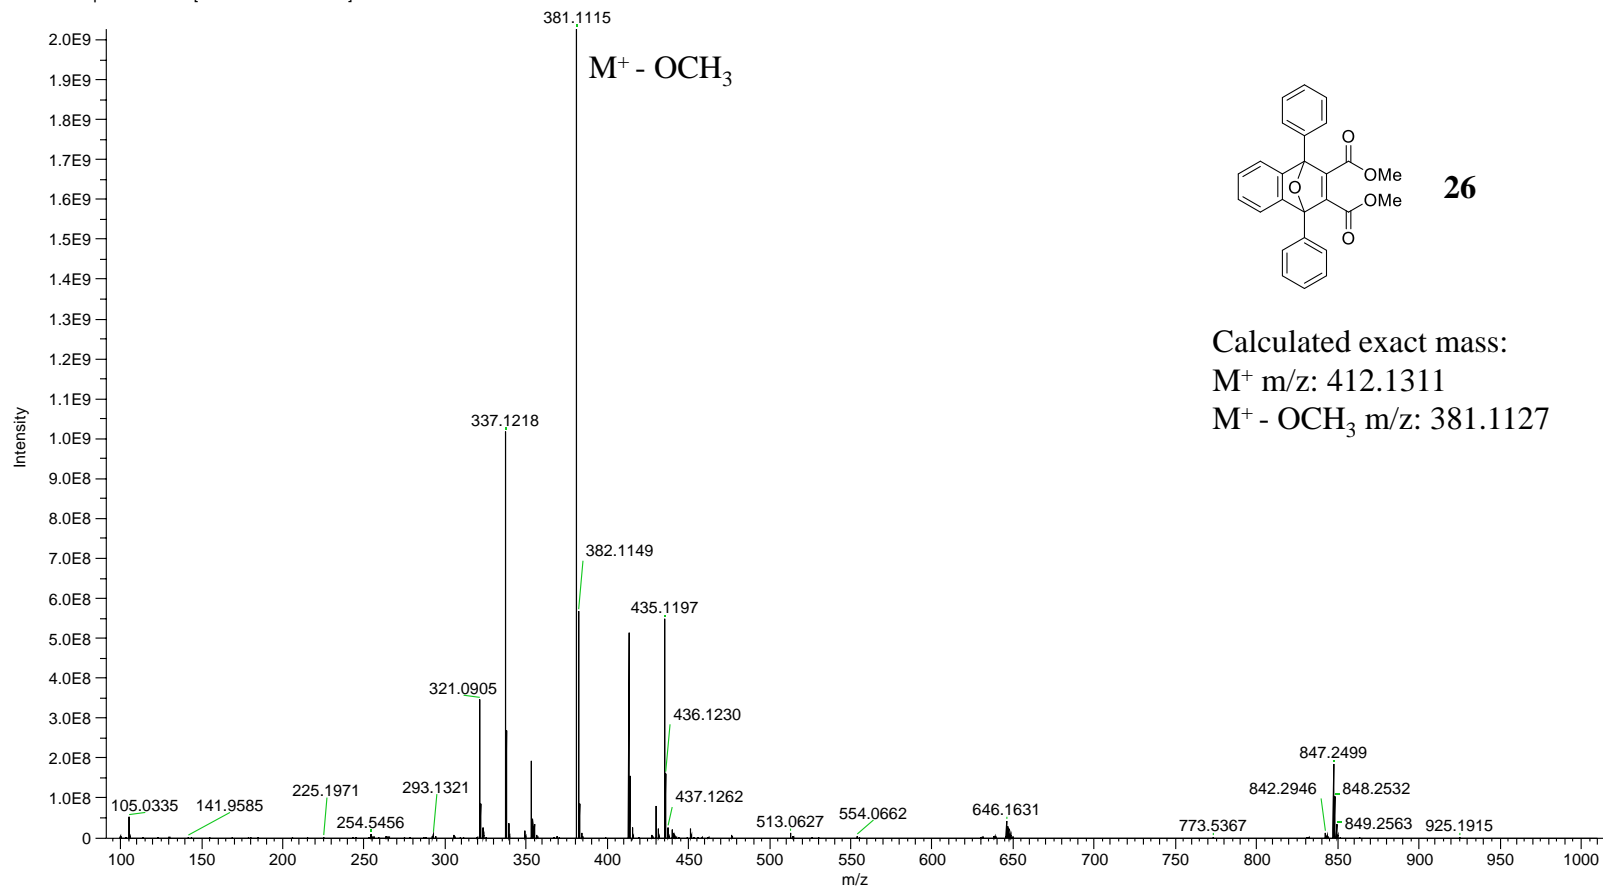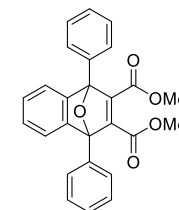

**26**

Calculated exact mass:

$M^+$  m/z: 412.1311

$M^+ - OCH_3$  m/z: 381.1127

T: FTMS + p ESI Full ms [100.0000-1000.0000]

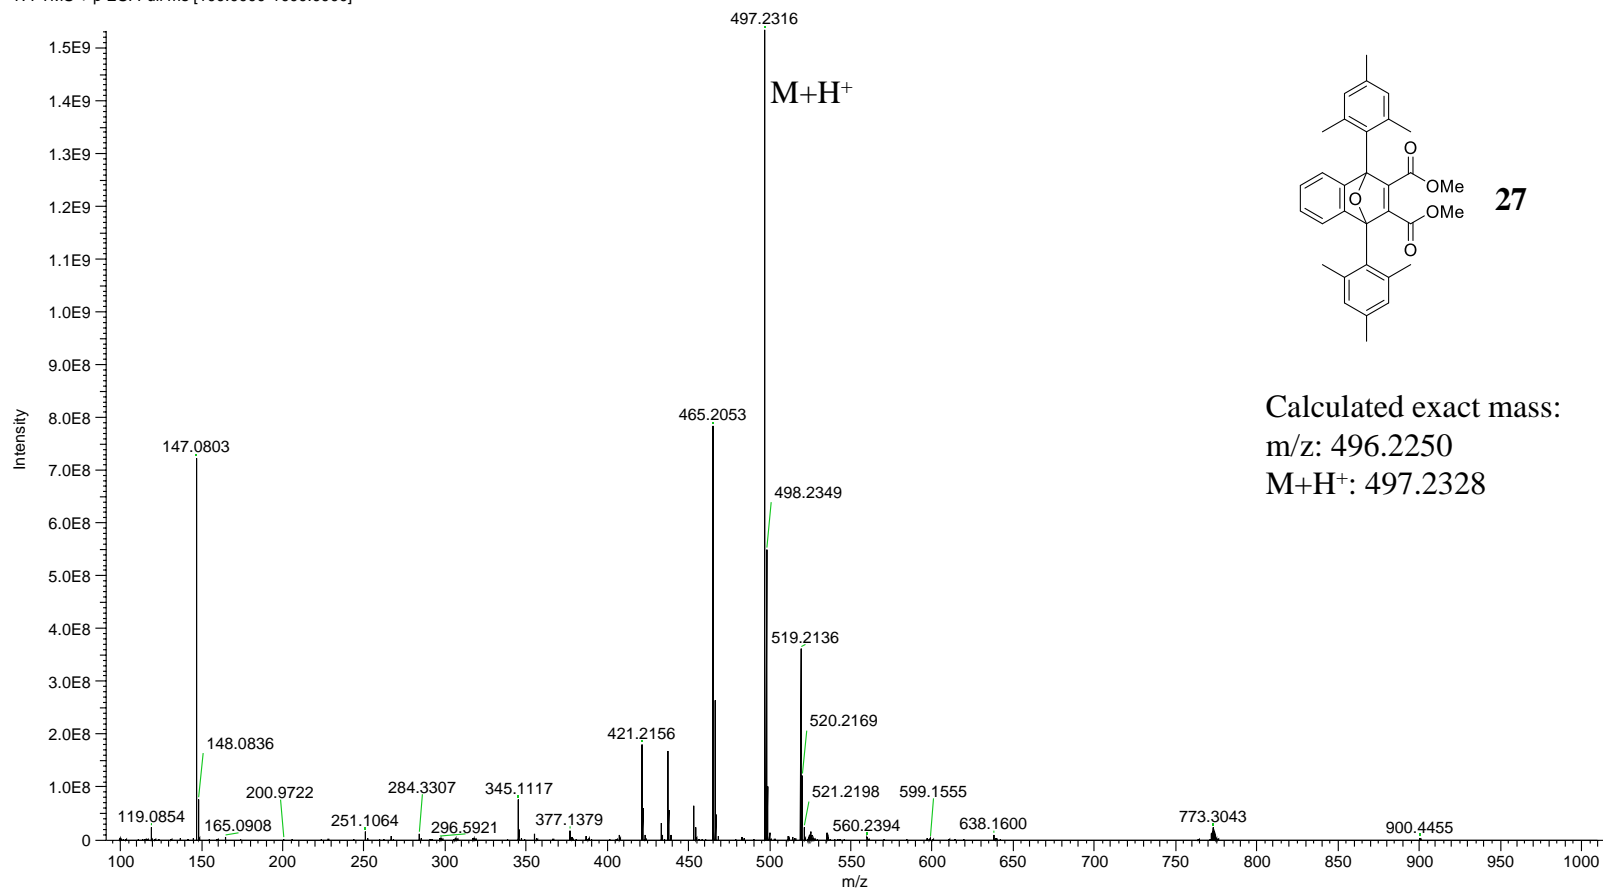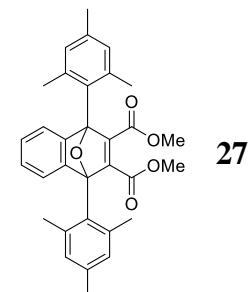

Calculated exact mass:  
m/z: 496.2250  
M+H<sup>+</sup>: 497.2328
